# Supplementary material
Source: PubMed Central journal article supplement (PMC5615371)
Supplement: ci7b00222_si_001.pdf [file ci7b00222_si_001.pdf]

## Supporting Information

# Comprehensive and Automated Linear Interaction Energy Based Binding-Affinity Prediction for Multifarious Cytochrome P450 Aromatase Inhibitors

*Marc van Dijk,<sup>1</sup> Antonius M. ter Laak,<sup>2</sup> Jörg D. Wichard,<sup>2</sup> Luigi Capoferri,<sup>1</sup> Nico P.*

*E. Vermeulen,<sup>1</sup> Daan P. Geerke<sup>1\*</sup>*

<sup>1</sup>AIMMS Division of Molecular Toxicology, Department of Chemistry and  
Pharmaceutical Sciences, Vrije Universiteit Amsterdam, De Boelelaan 1108, 1081 HZ

Amsterdam, The Netherlands, and <sup>2</sup>Bayer AG, Pharmaceuticals Division,

Müllerstrasse 178, D-13353 Berlin, Germany

\* [d.p.geerke@vu.nl](mailto:d.p.geerke@vu.nl)

### **Rule-based protocols for resolving eight types of protein-ligand interactions using in-house python software**

*Hydrogen-bonded contacts:* Pre-select all heavy atom contacts within 0.41 nm, not involving water molecules or ions. Identify donor-acceptor pairs according to their SYBYL atom type (acceptors: N.3, N.2, N.1, N.acid, N.ar, O.3, O.co2, O.2, S.m, S.a; donors: N.3, N.2, N.acid, N.am, N.ar, N.4, N.pl3, N.plc, O.3) as assigned by OpenBabel version 2.3.2.<sup>1</sup> Label the pairs as hydrogen bonded interaction if (*i*) the

donor atoms has at least one covalently bonded hydrogen atom, *(ii)* the angle between any identified donor – hydrogen – acceptor pair does not deviate more than 50° from its ideal in-plane (180°) orientation,<sup>2</sup> and *(iii)* the angle between the acceptor heavy atom neighbor – acceptor – hydrogen pair does not deviate more than 90° from its ideal in-plane (180°) orientation. The positions of hydrogen atoms not part of trigonal planar donors are locally optimized. Interactions identified as hydrogen bonds were labeled as acceptor-donor (hb-ad), donor-acceptor (hb-da) or both (hb).

*Water mediated hydrogen-bonded contacts:* Pre-select all water oxygen atoms within a range<sup>3</sup> of 0.25 to 0.4 nm of any ligand or protein atom. For each water molecule, identify possible ligand donor – water – protein acceptor and ligand acceptor – water – protein donor pairs according to their SYBYL atom types (see *Hydrogen-bonded contacts*). Label a pair as water-mediated hydrogen bond if *(i)* the donor atom has at least one covalently bonded hydrogen atom, *(ii)* the  $\Theta$  angle (water oxygen – donor hydrogen – donor) is larger than 100°,<sup>3</sup> and *(iii)* the  $\omega$  angle (acceptor – water oxygen – donor hydrogen) is within the range 75°-140°.<sup>3</sup> A water molecule is only allowed to participate as donor with a maximum of two hydrogen bonds. In case of more than two possible contacts, the ones with a  $\Theta$  closest to 110° and/or smallest hydrogen bond distances are kept. Interactions identified as water mediated hydrogen bonds were labeled ‘wb-ad’ (acceptor-donor), ‘wb-da’ (donor-acceptor), or both (wb).

*Halogen-bonded contacts (xb):* Pre-select all heavy atom contacts within 0.41 nm between a proximal nitrogen, oxygen or sulfur atom and a halogen atom (I,Br,Cl,F) not involving water molecules. Identify acceptor and donor groups and label as halogen bond if *(i)* the halogen has only one covalent carbon as neighbor (donor), *(ii)* the angle between the donor-halogen-acceptor pair does not deviate more than 30° around the optimal halogen donor angle of 165°, and *(iii)* the angle between the

acceptor-halogen-donor pair does not deviate more than 30° around the optimal halogen acceptor angle of 120°. <sup>4</sup>

*Salt bridging contacts:* Pre-select all heavy atom contacts within 0.55 nm (value from reference 5 + 0.15 nm) between amino acid and ligand positive and negative charge centers defined by their SYBYL atom types as positive charges on the side-chain nitrogen atoms of arginine, lysine and histidine (SYBYL: N.pl3, N.4, N.ar), negative charges on the carboxyl groups in aspartic acid and glutamic acid (SYBYL: O.co2), positively charged ligand centers (SYBYL: N.4, N.am, S.3, C.cat), and negatively charged ligand centers (SYBYL: O.co2, S.3, S.O2). A physiologically relevant pH is assumed (pH ~7.4). Interactions identified as salt bridging were labeled as negative ligand to positive amino-acid (sb-np) or positive ligand to negative amino-acid (sb-pn). Salt bridging contacts have precedence over hydrogen-bonded contacts if they involve the same pair of heavy atoms.

*Cation- $\pi$  interaction (pc):* Pre-select all heavy atom contacts within 0.7 nm between ligand positive charge centers (see *salt bridging contacts*) and aromatic amino-acids. A contact is labeled as cation- $\pi$  interaction if the distance between the cation and the amino-acid ring center is smaller than 0.6 nm, <sup>6</sup> and the offset between the ring center and the cation projected onto the ring plane is less than 0.2 nm. If the cation involves a tertiary or quaternary amine, the angle between the ring center, the covalent heavy atom neighbor of the amine closest to the ring center, and the amide nitrogen should be larger than 90° as filter for cation- $\pi$  interactions going “through” the ligand.

*Aromatic stacking:* contacts between aromatic rings are labeled as  $\pi$ - or T-stacking interactions (ps, ts respectively) if (i) the center-of-mass between the two rings is within 0.75 nm, <sup>7</sup> (ii) the offset distance between the center-of-mass of one ring projected onto the other is no more than 0.2 nm, and (iii) the angle between the

normals of both rings does not deviate more than  $30^\circ$  from the ideal  $180^\circ$  for  $\pi$ -stacking and  $90^\circ$  for T-stacking.  $\pi$ -stacking was evaluated between the aromatic amino-acid (F,H,W,Y) rings and ligand aromatic rings resolved using a DFS-based cycle detection algorithm to find the set of smallest unique rings in the structure, with additional check on planarity and aromaticity.

*Hydrophobic interactions (hf)*: contacts are labeled hydrophobic if both atoms involved are carbons within a distance of 0.4 nm and they only have carbon or hydrogen atoms as covalent neighbors. If the hydrophobic interactions are part of a ring system involved in  $\pi$ - or T-stacking interactions they are removed. If one ligand atom has a hydrophobic interaction with multiple atoms of the same amino-acid, the one with the smallest distance is retained.

*Heme-coordination (hc)*: ligand aromatic nitrogen atoms were labeled as possible heme iron coordinating if (i) the distance between the nitrogen atom and the heme iron was below 0.35 nm, (ii) the distance between the nitrogen projected onto the plane of the heme is less than 0.1 nm, and (iii) the normal angle between the aromatic ring structure and the heme plane is between  $90^\circ \pm 45^\circ$  (cone fit).<sup>8</sup>

Figure S1. Time series of electrostatic ( $V_{lig-surr}^{el}$ , in violet) and van der Waals interaction energies ( $V_{lig-surr}^{vdW}$ , in blue) between a ligand and its surrounding during MD for a random and representative selection of six simulations, as indicated per simulation by the ID of the ligand and (starting) pose. Black dashed and solid lines in the lower panel are fitted splines to the time series of  $V_{lig-surr}^{el}$  and  $V_{lig-surr}^{vdW}$ , respectively, after FFT filtering. In the upper panels, gradients (grad) of the fitted splines are presented (in  $\text{kJ mol}^{-1} \text{ps}^{-1}$ ).

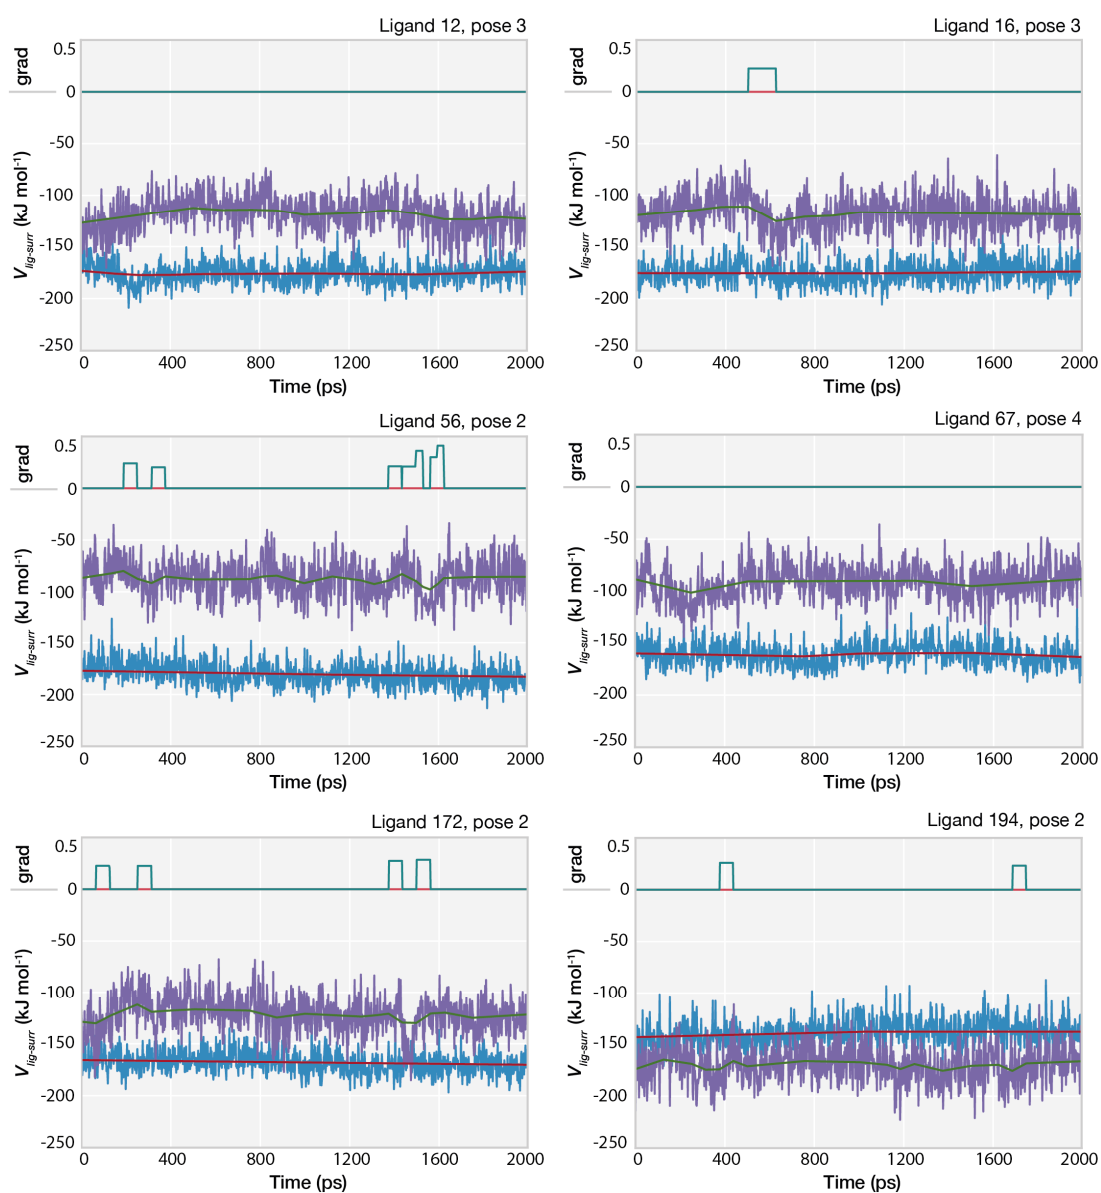

Figure S2. Multivariate normal distribution analysis of  $\Delta V^{vdW}$  and  $\Delta V^{el}$  energy values. The red ellipsoid marks the 97.5% confidence limit of the fitted distribution. Ligand simulations located outside the confidence limit are colored red and labeled with their ligand ID followed by the simulation ID. Corresponding fitted distribution for both energy values are displayed along the axis.

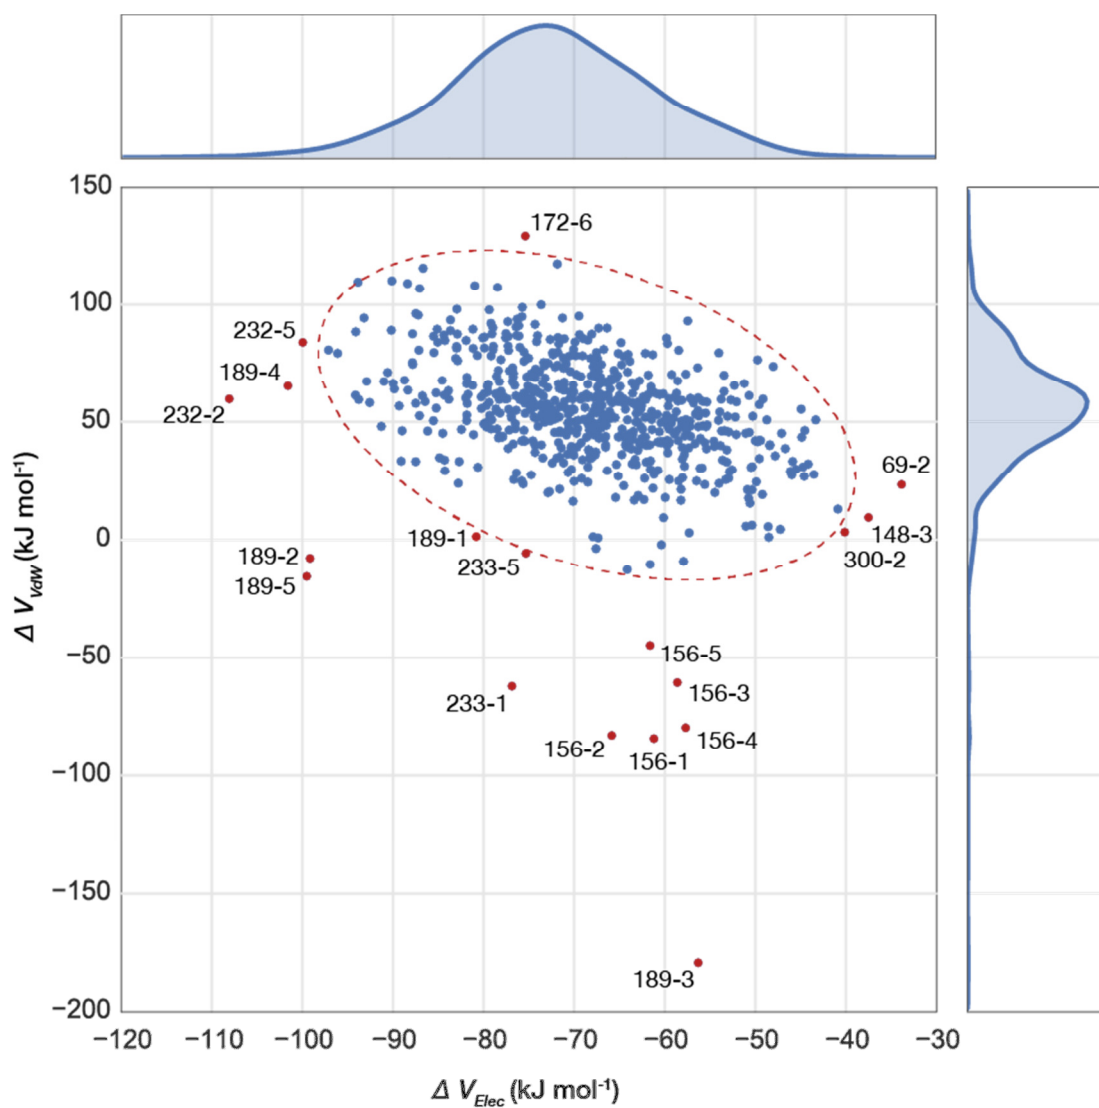

Figure S3. Bootstrap cross-validation results for the combined model 2 and 3 illustrating a unified model with  $\text{RMSE} \geq 3.4 \text{ kJ.mol}^{-1}$ , and a separation into two individual models with RMSE values lower than  $3.4 \text{ kJ.mol}^{-1}$  (idealized distributions are shown as gray lines). Bootstrap cross-validation was performed 24000 times with random samples ranging in size from 14 to 84 cases, with steps of 2 cases. Shades of blue color in the matrix plot represent the number of times the particular ligand (x-axis) occurred in all of the bootstrap models within an RMSE range (y-axis) that were accepted according to the statistical acceptance criteria (see Methods section). Additional mixing of the ligands in the accepted models with an RMSE lower than  $3.4 \text{ kJ.mol}^{-1}$  was performed to validate that the segregation between models 2 and 3 was not due to an absence of the ligands in the overlap region of the two models.

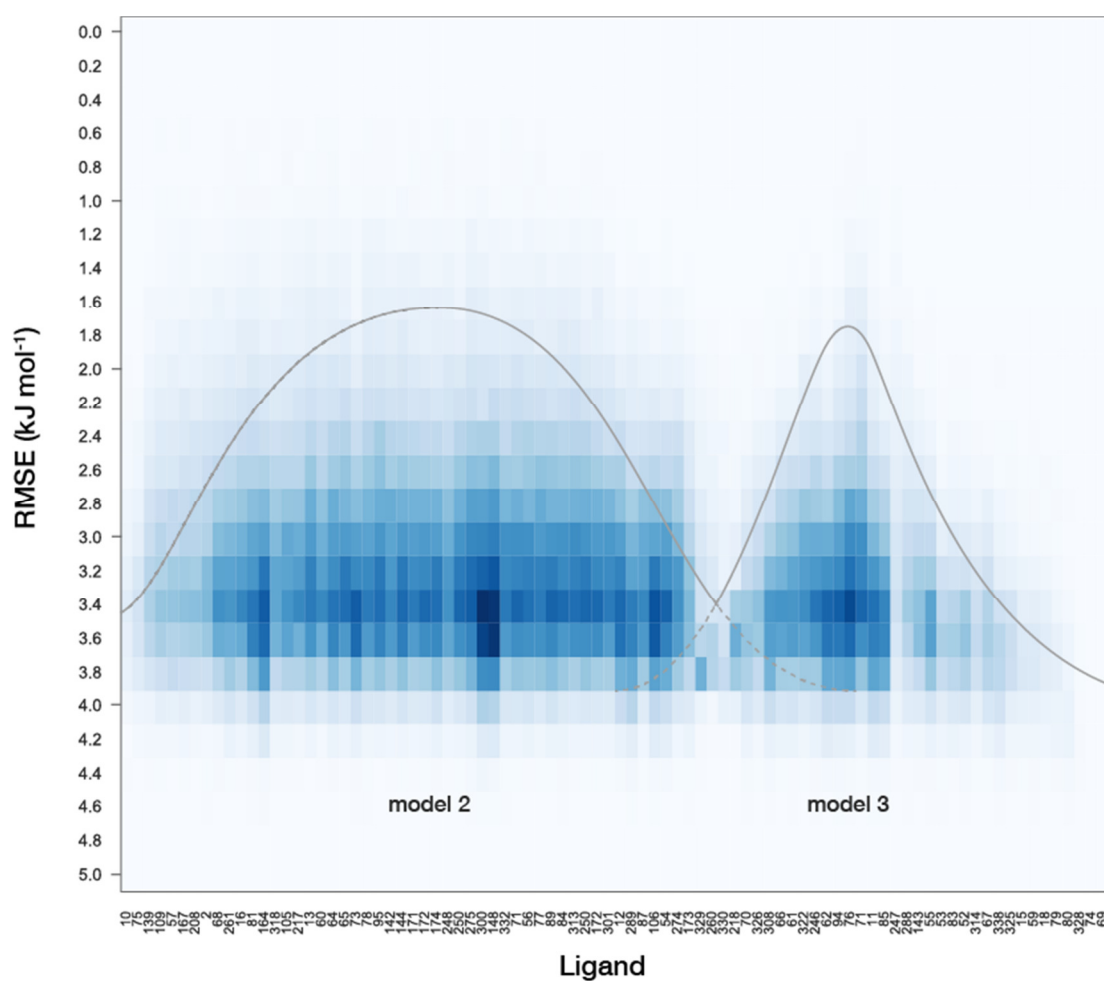

Figure S4. Absolute  $\Delta G_{\text{pred}}$  error values (residuals) for each compound, when compared to the experimentally obtained  $\Delta G_{\text{obs}}$  when calculated using model 1 (blue), model 2 (green) or model 3 (purple) derived from the stochastic approximate inference. Values for the residuals are represented as vertically stacked bars.

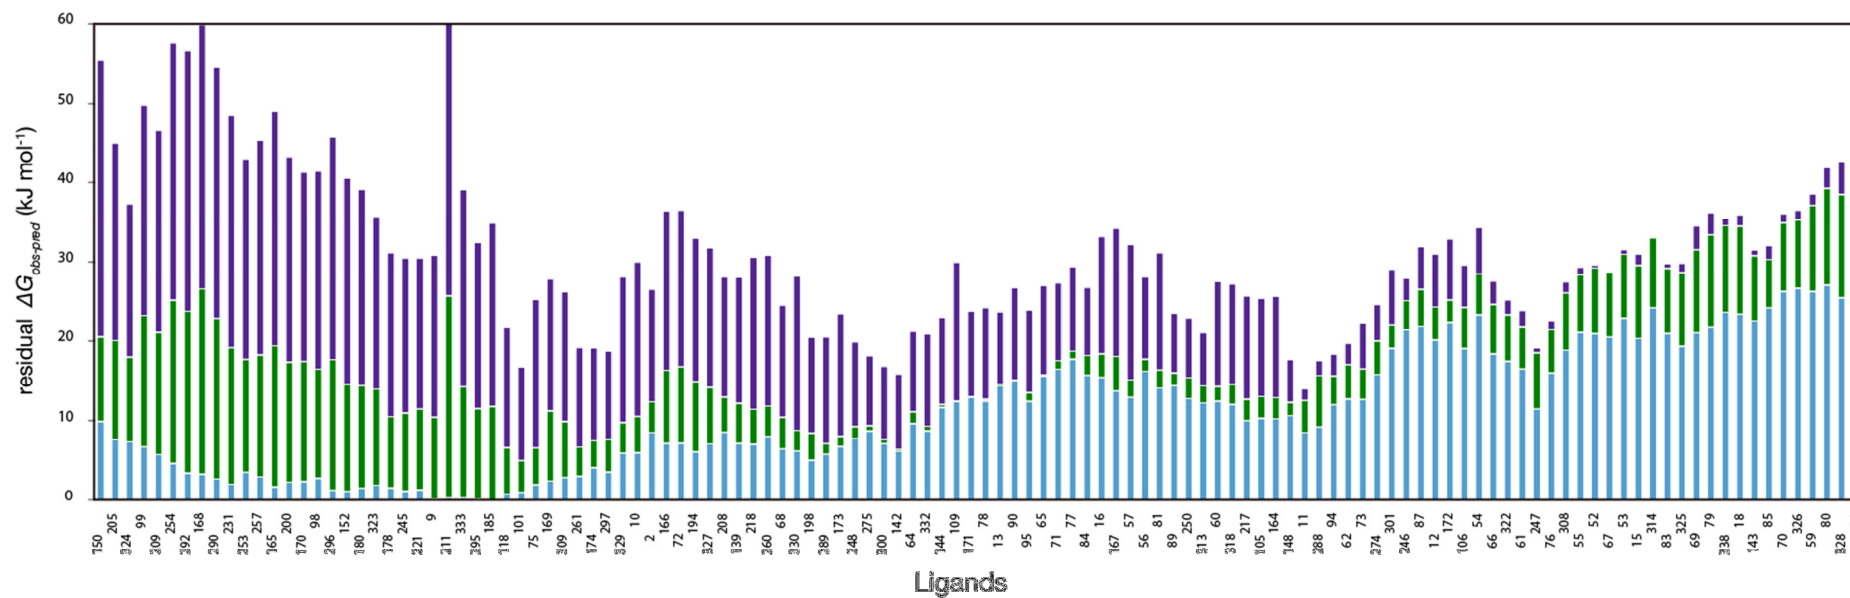



Figure S5. Stick representation (gray) of the dominant binding pose (pose with the highest weight  $W_i$  in the LIE binding affinity model, eq. 2) of 10 steroidal aromatase inhibitors explained by LIE binding affinity prediction model 1. The displayed poses for these 10 compounds were derived from representative snapshots of the molecular dynamics simulation and illustrate the similarity in binding pose when compared to the natural substrate of Cytochrome P450 19A1 (PDB code 3EQM, cartoon representation), 4-androstene-3-17-dione (ASD, cyan stick representation). Protein residues (including the heme group, HEME) involved most frequently in polar protein-ligand interactions in more than 50% of the simulation time are displayed in stick representation.

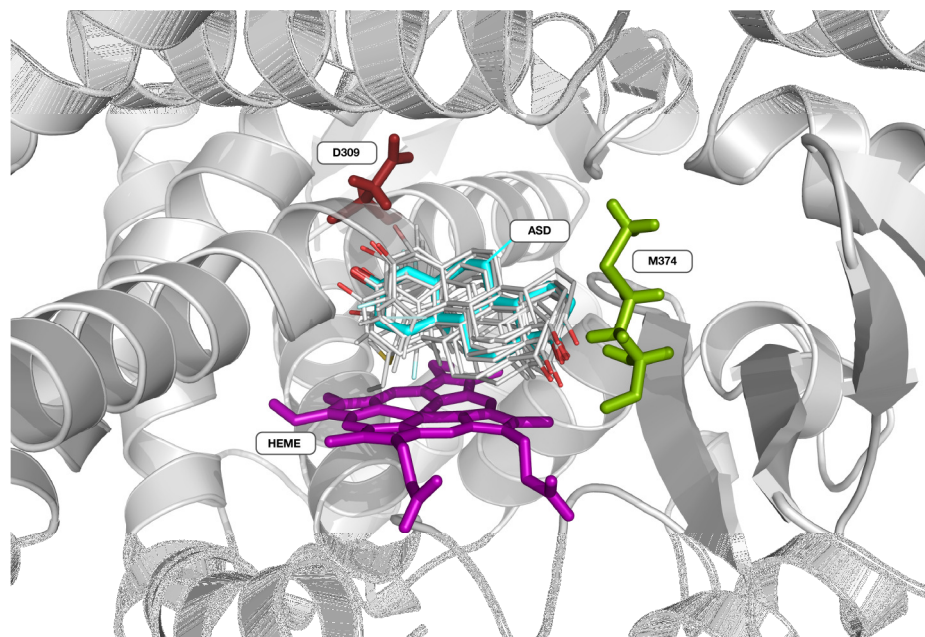

Figure S6. Molecular structures of a selection of compounds (with ligand ID) from final LIE models 1, 2 and 3.

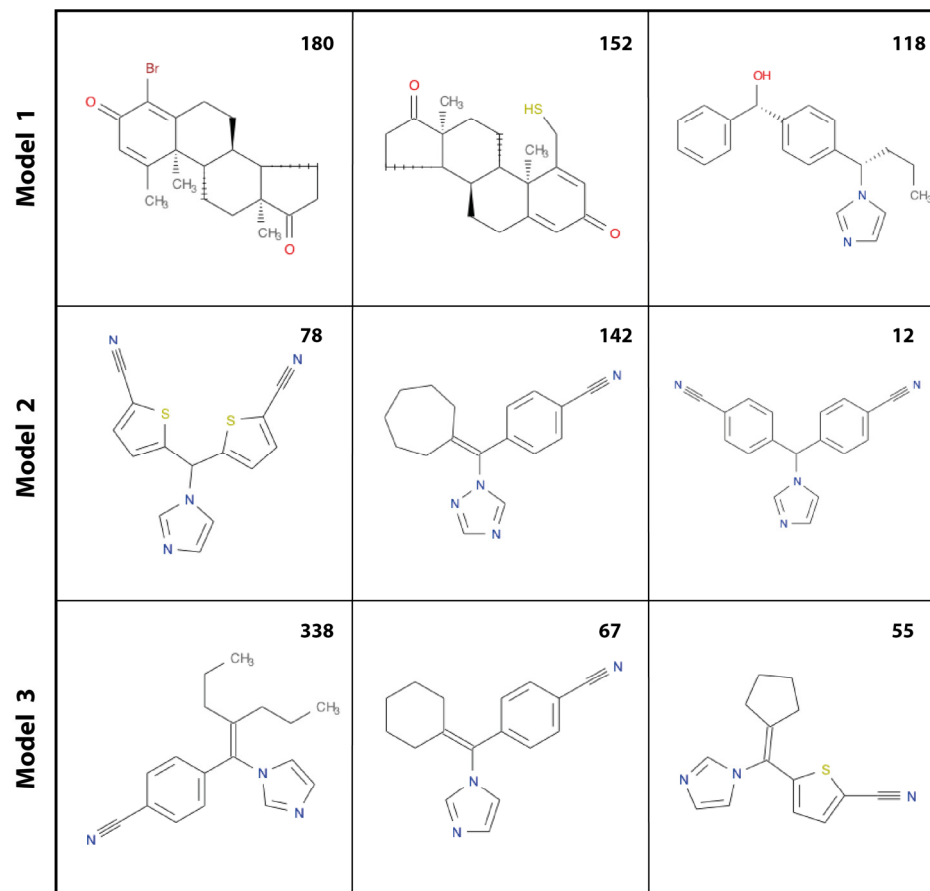

Table S1: Dataset of 132 putative aromatase inhibitors. Listed are the ligand ID used throughout the study; 2D structure depiction (generated using Open Babel version 2.3.2); molecular mass (MW); experimentally determined inhibition constants ( $pK_i$ ) provided by *Bayer Pharma AG*, and corresponding experimental Gibbs free energy values calculated as  $\Delta G_{\text{obs}} = -RT \ln(10^{pK_i})$  at a temperature  $T = 305$  K; the predicted binding affinity ( $\Delta G_{\text{pred}}$ );  $W\Delta V_{\text{vdW}}$  and  $W\Delta V_{\text{Elec}}$  are the weighted and MD averaged differences in the Van der Waals and Coulomb components of nonbonded interaction energies after applying Boltzmann weighting to the selected poses; model ID used for the prediction; and the number of simulations (Nr. poses) used for the prediction. The 6 duplicate compounds are labeled as such in the structure column. The numerical data in this table, together with the canonical SMILES string, are also made available as spreadsheet (vandijk\_CYP19\_supp\_S4.xlsx) as part of the supporting information.

| ID | Structure                                                                                        | MW (u) | $pK_i$ | $\Delta G_{\text{obs}}$<br>(kJ.mol <sup>-1</sup> ) | $\Delta G_{\text{pred}}$<br>(kJ.mol <sup>-1</sup> ) | $W\Delta V_{\text{vdW}}$<br>(kJ.mol <sup>-1</sup> ) | $W\Delta V_{\text{Elec}}$<br>(kJ.mol <sup>-1</sup> ) | Model | Nr. poses |
|----|--------------------------------------------------------------------------------------------------|--------|--------|----------------------------------------------------|-----------------------------------------------------|-----------------------------------------------------|------------------------------------------------------|-------|-----------|
| 2  | 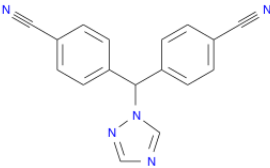<br>Letrozole | 285.30 | 8.19   | -47.82                                             | -51.54                                              | 46.37                                               | -75.54                                               | 2     | 1         |

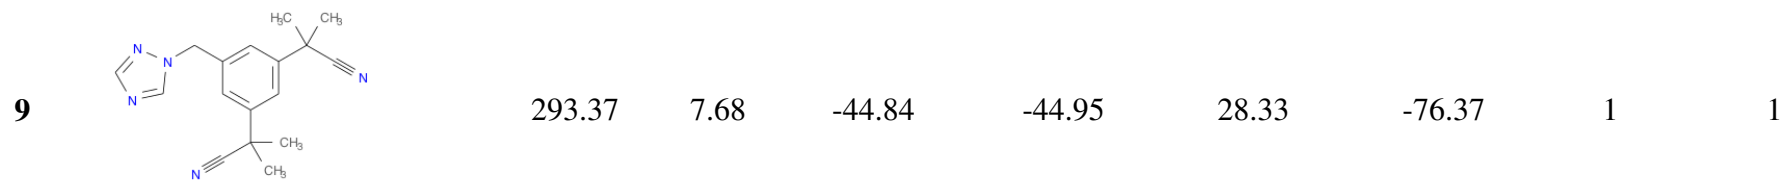

Anastrozole

---

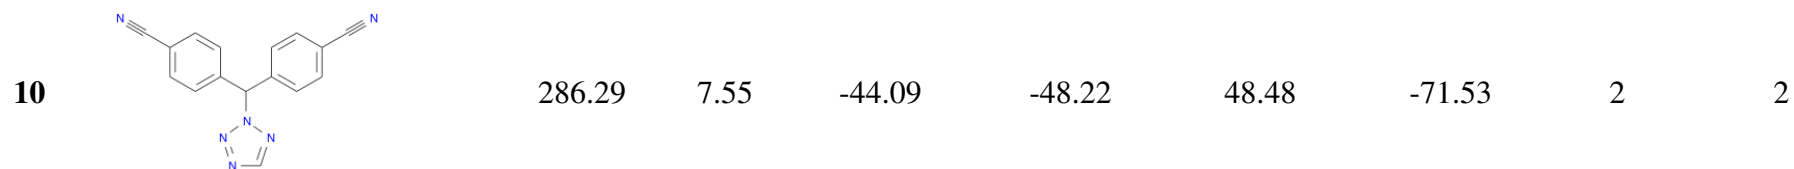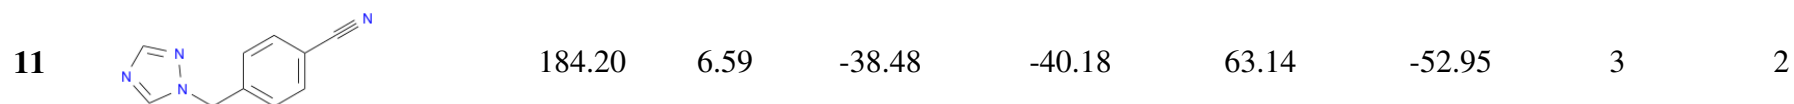

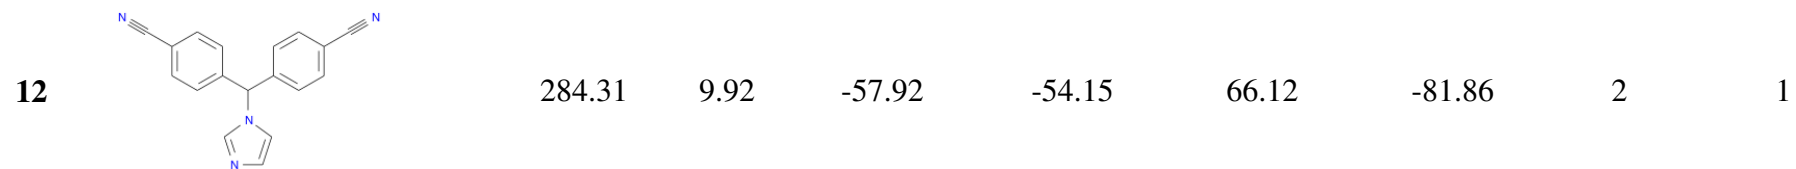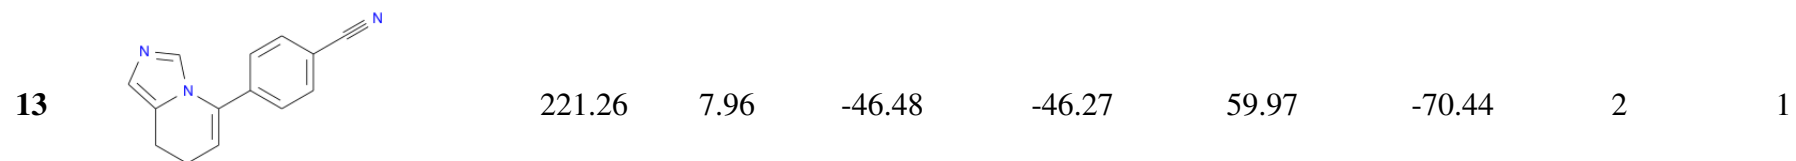

Fadrozole

---

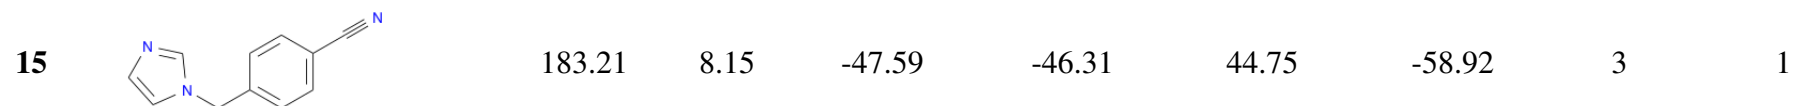

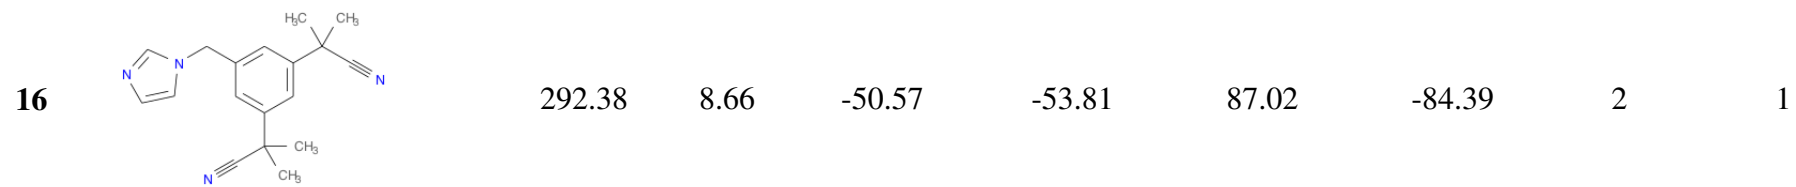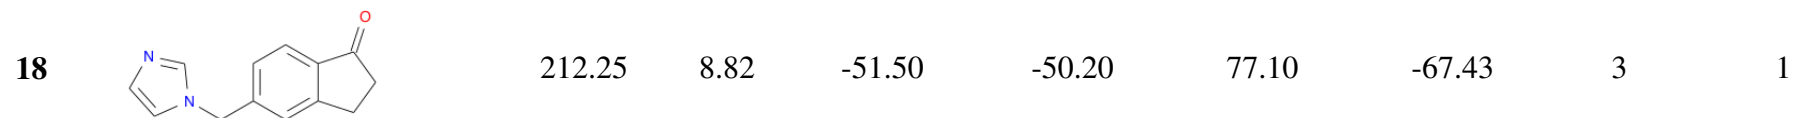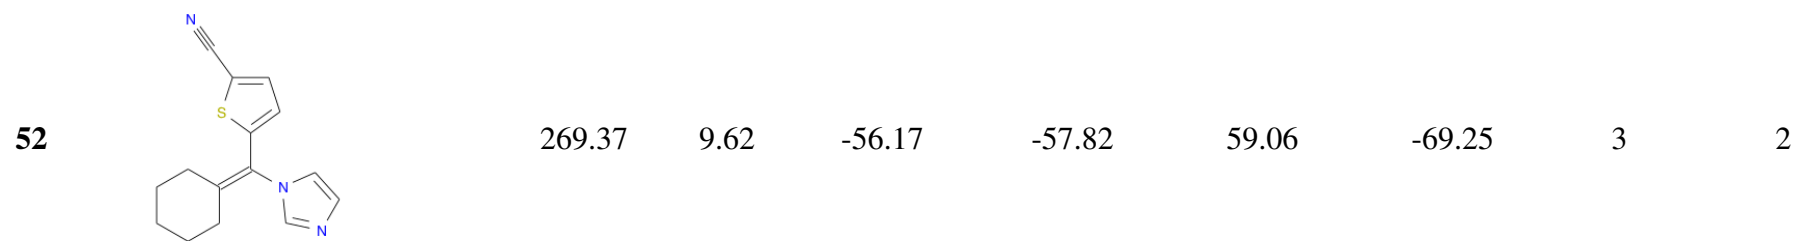

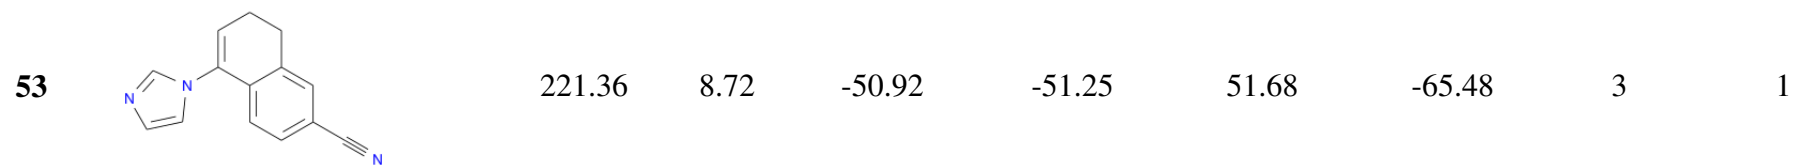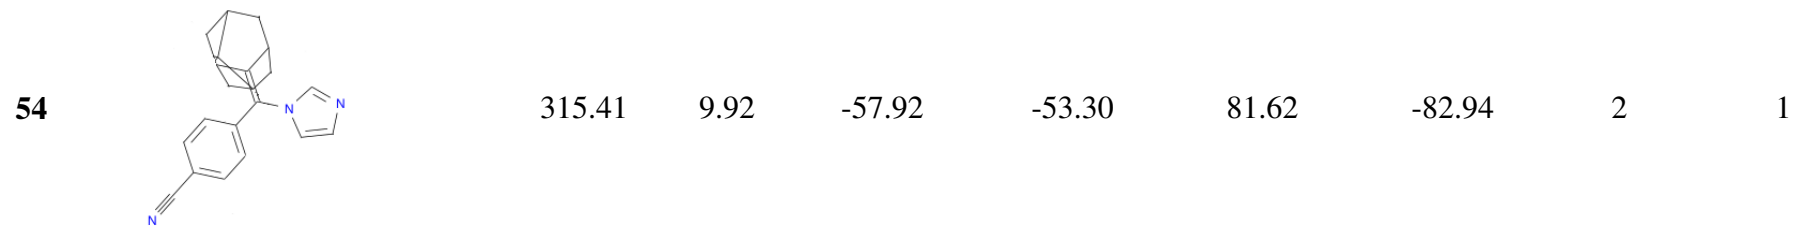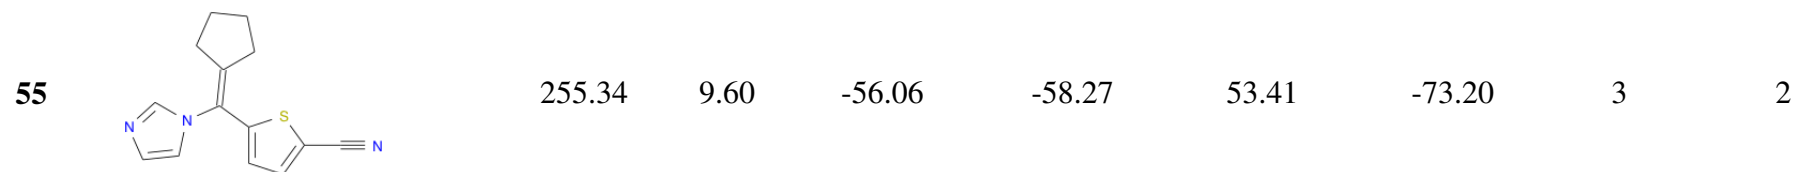

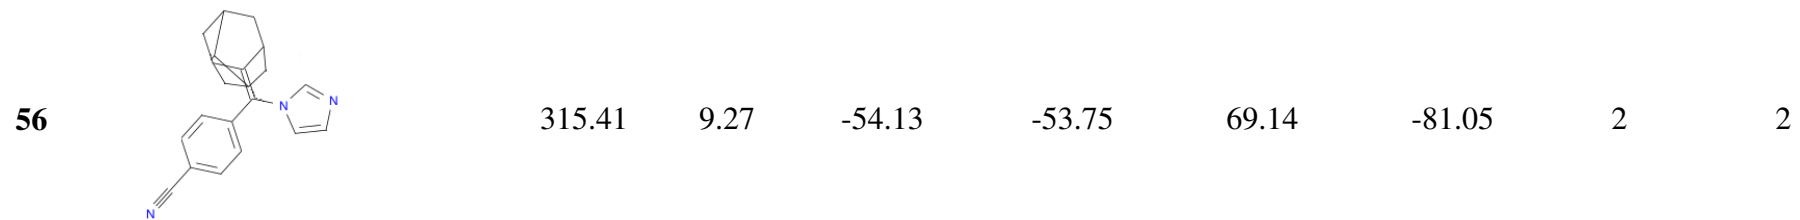

Duplicate of 54

---

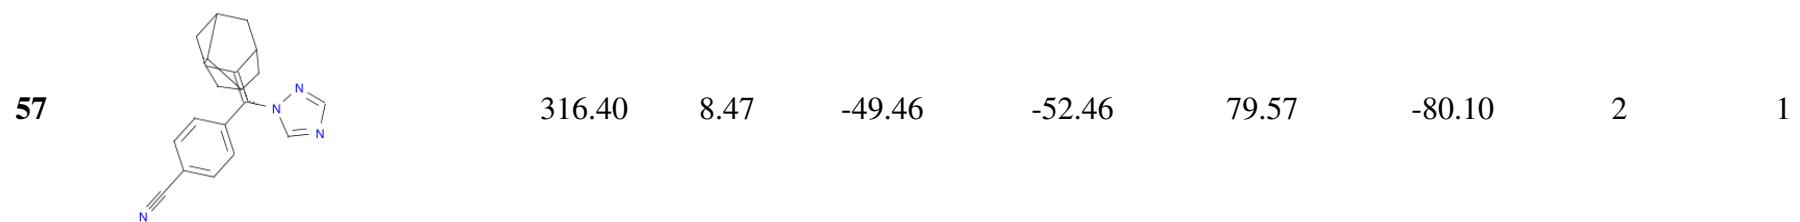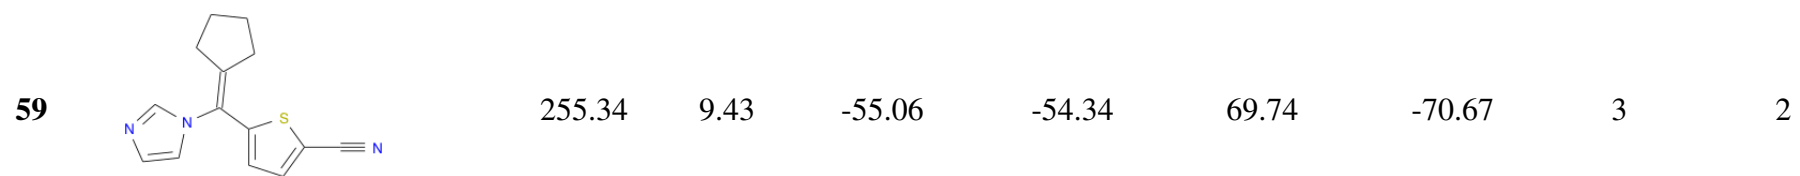

Duplicate of 55

---



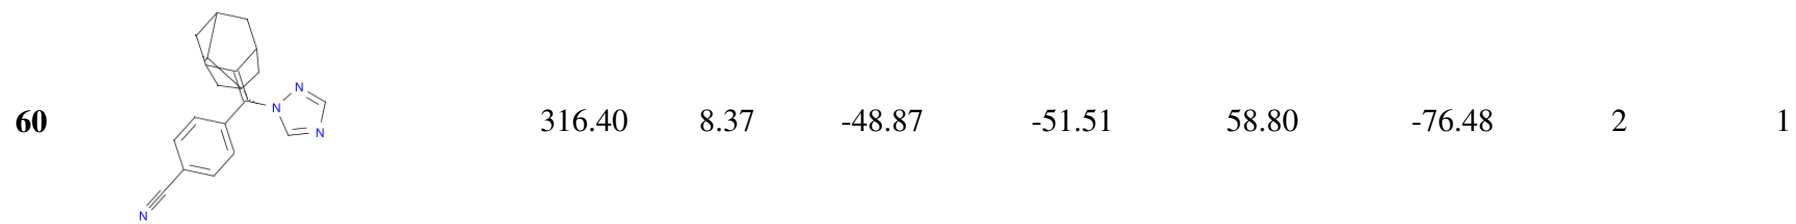

Duplicate of 57

---

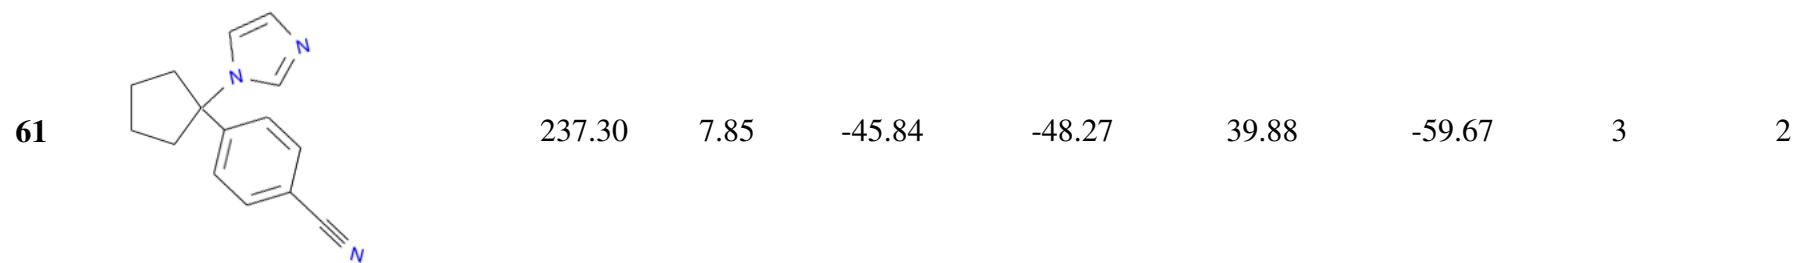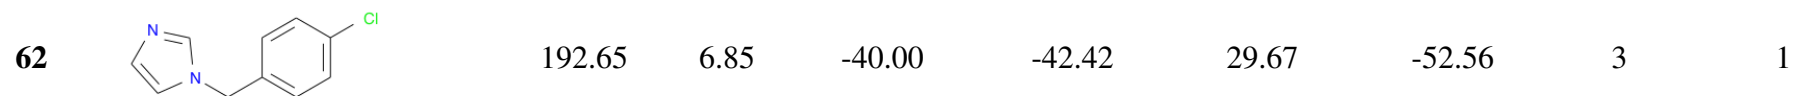

---

**64**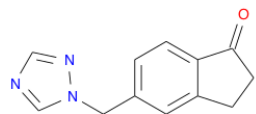

213.24

7.28

-42.51

-43.85

42.03

-64.64

2

2

---

**65**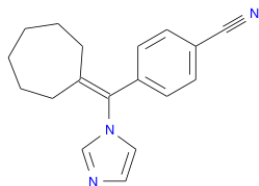

277.36

8.68

-50.68

-51.14

89.49

-81.17

2

1

---

**66**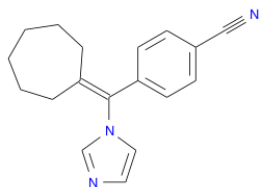

277.36

9.28

-54.19

-57.17

58.24

-73.11

3

2

---

Duplicate of 65

---

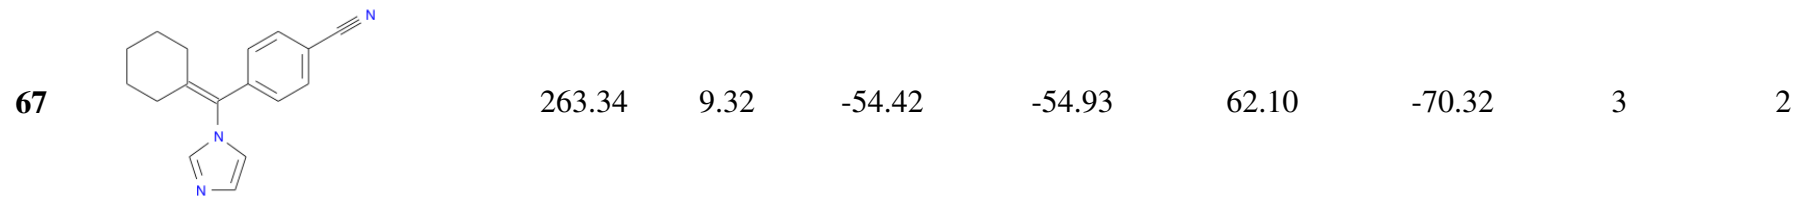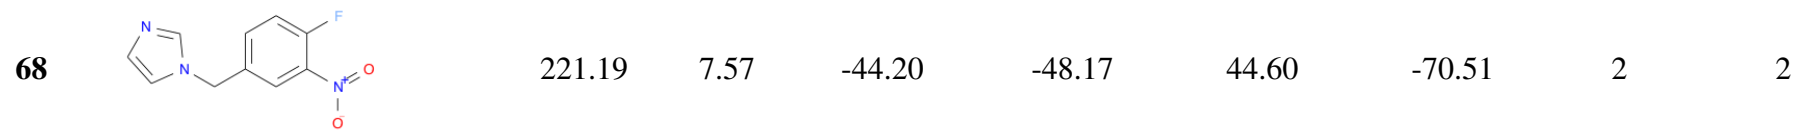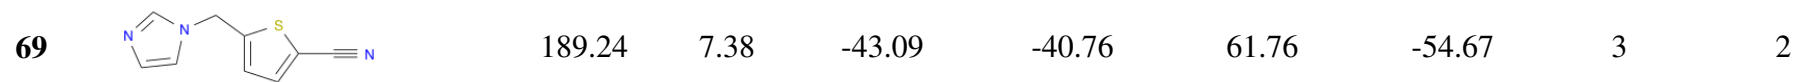

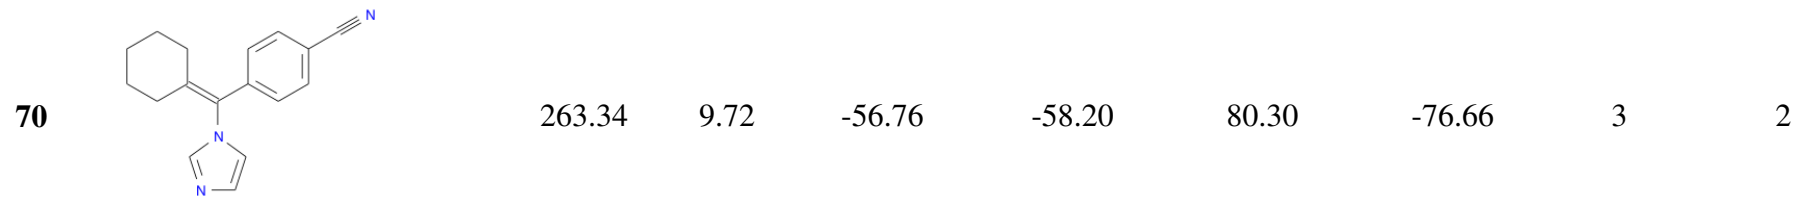

Duplicate of 67

---

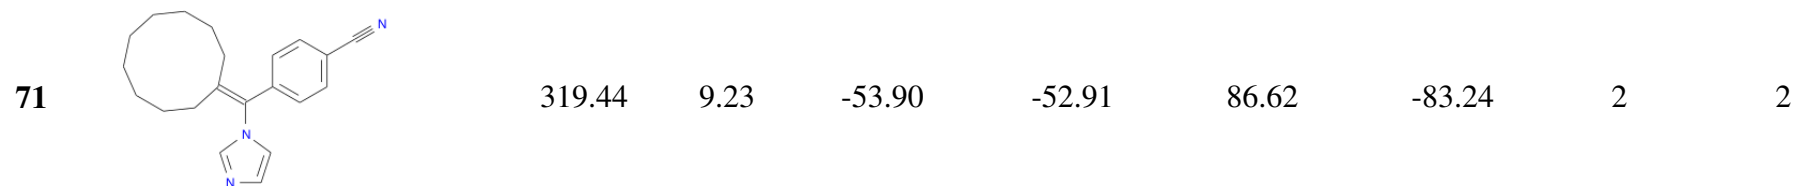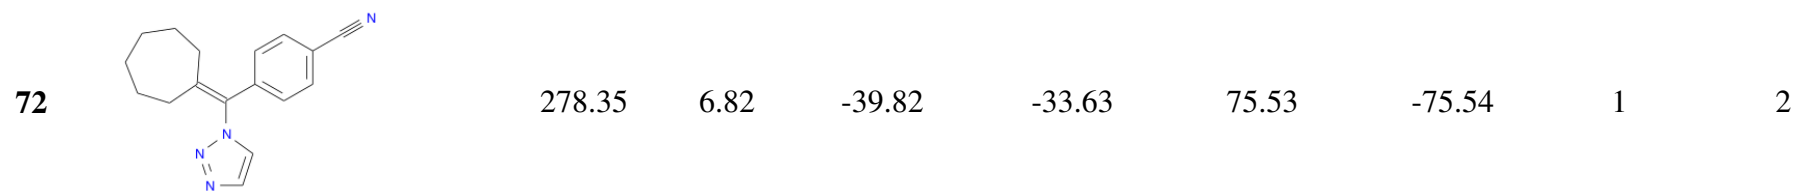

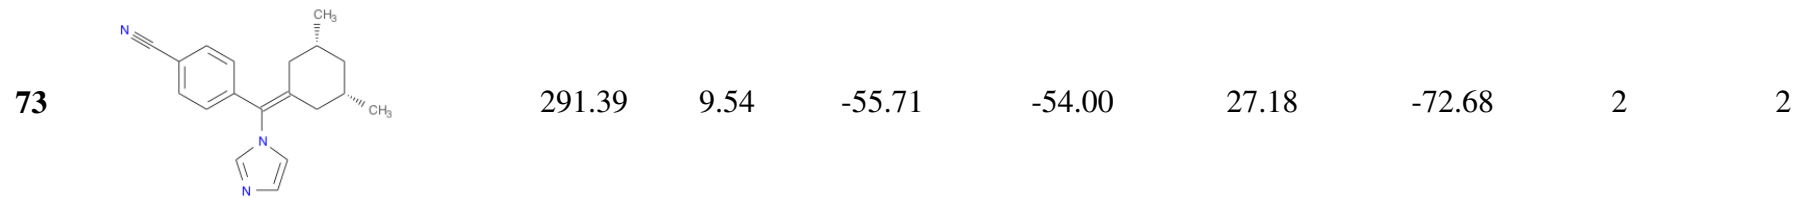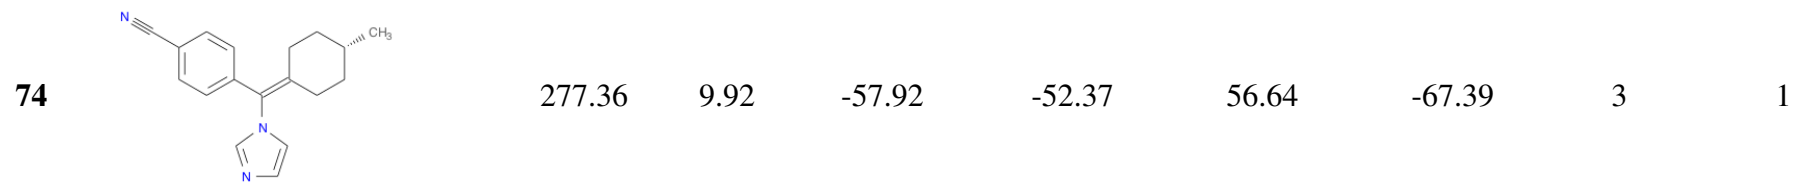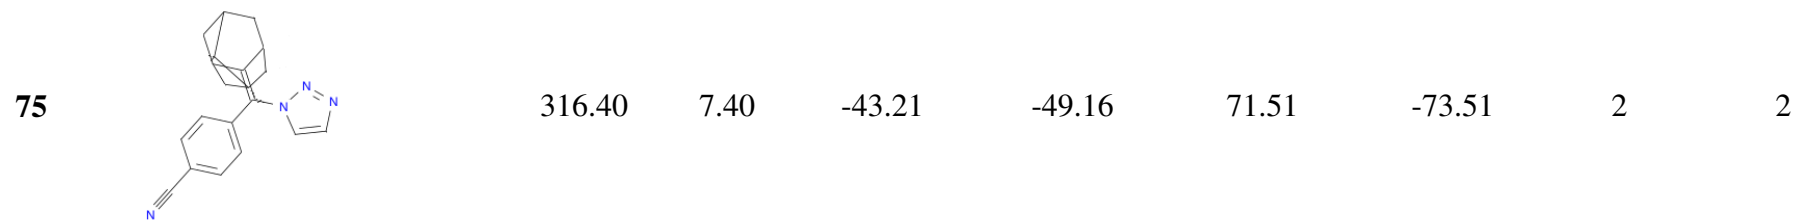

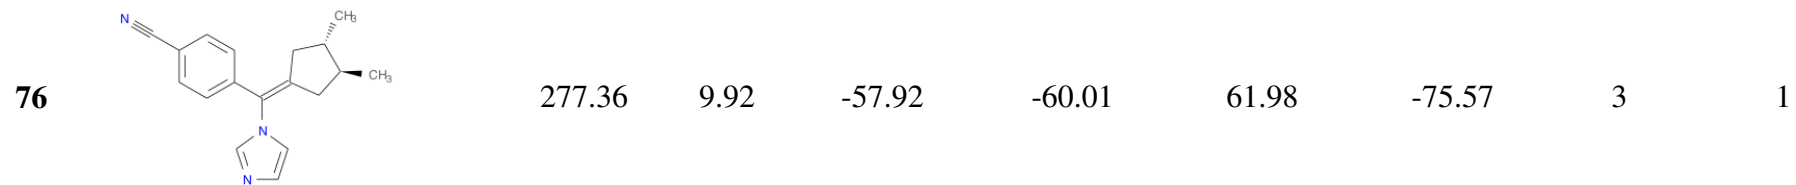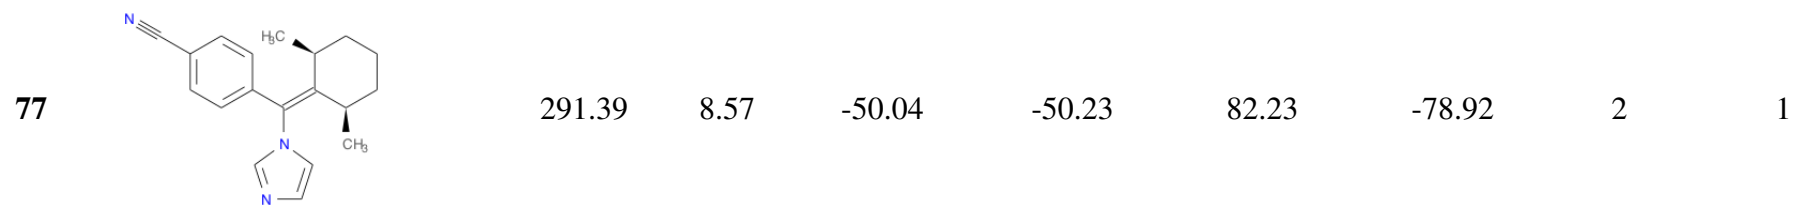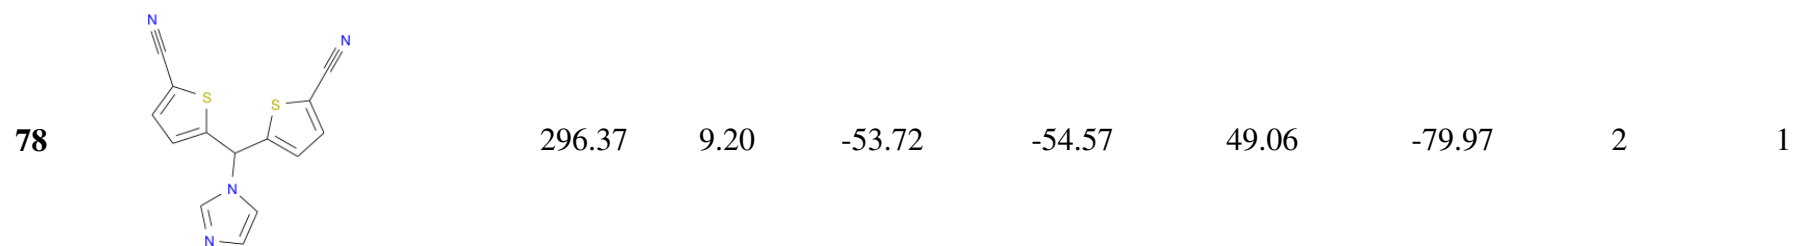

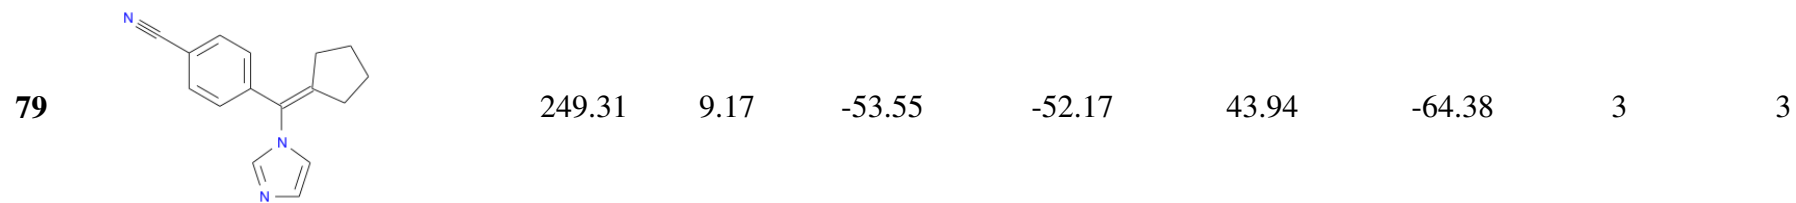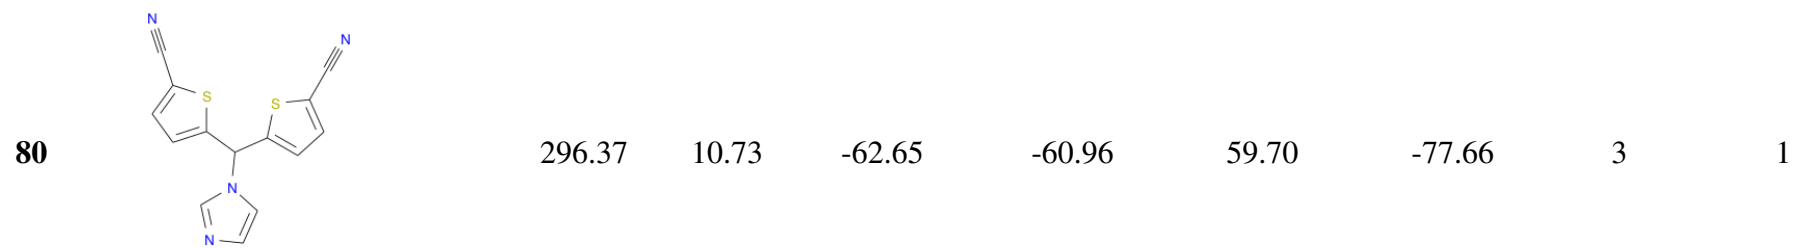

Duplicate of 78

---

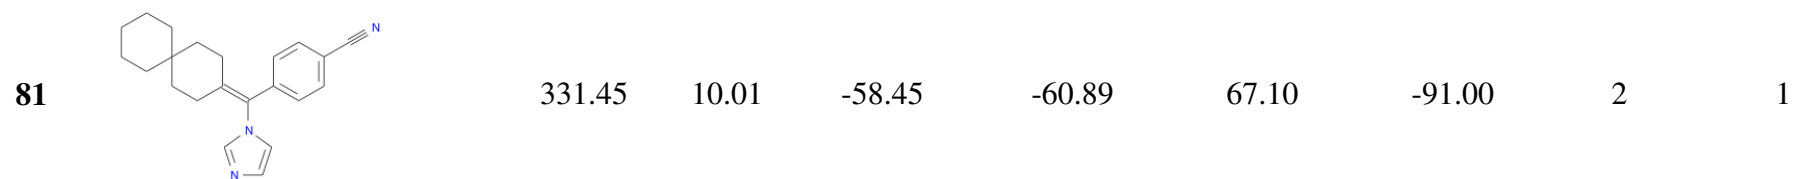

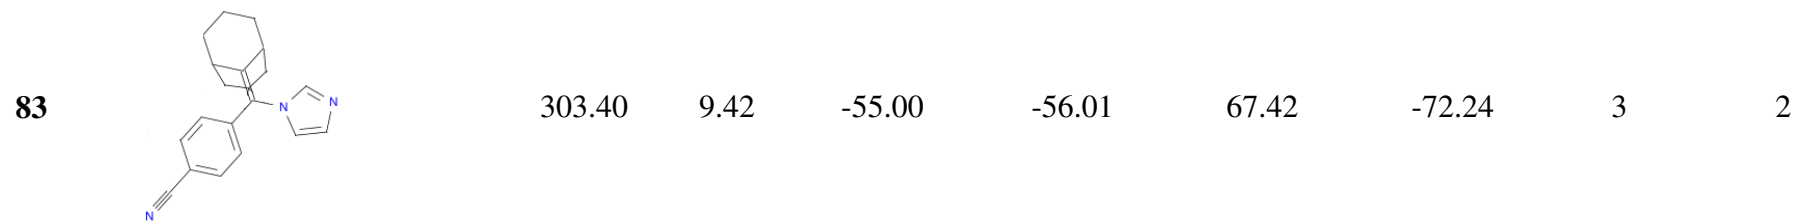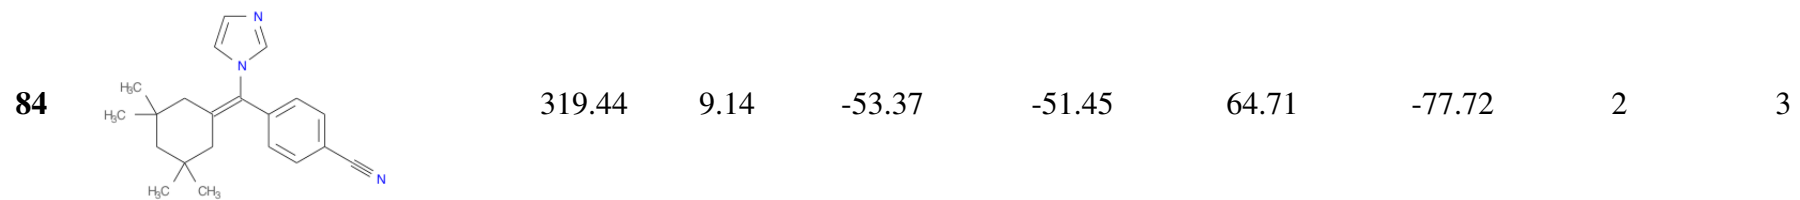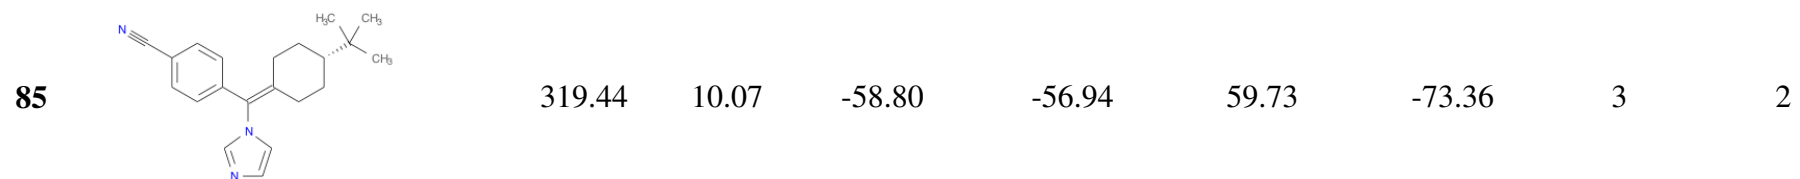



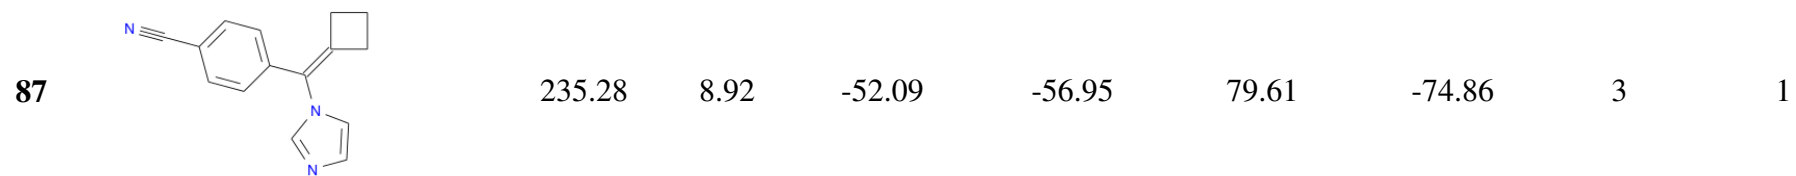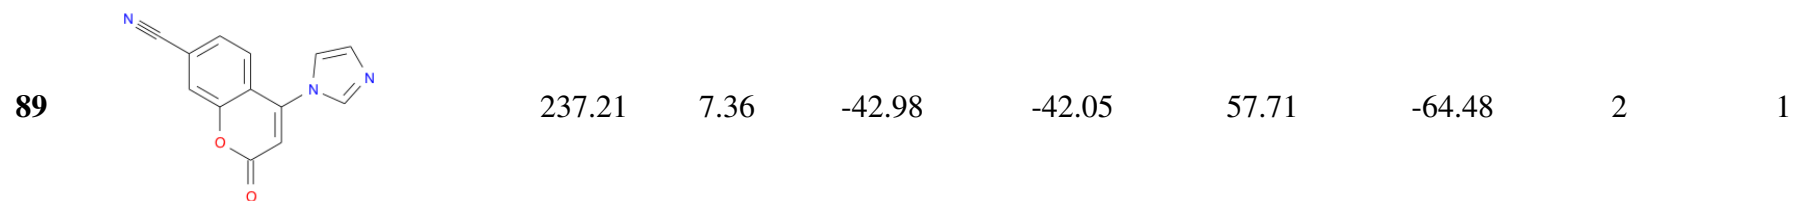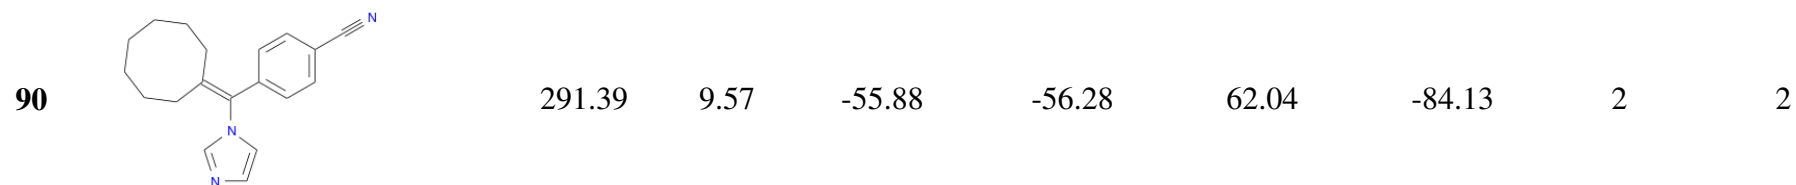

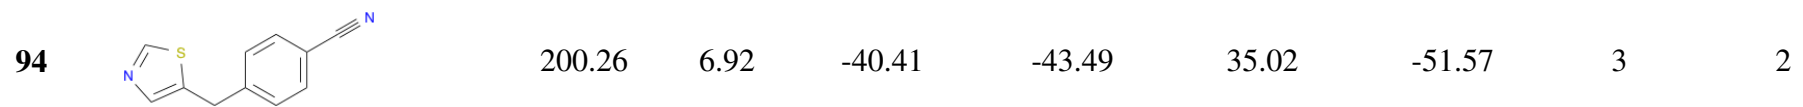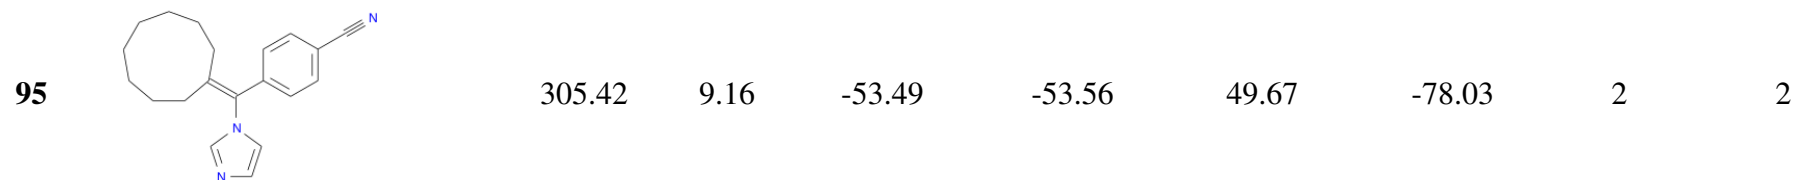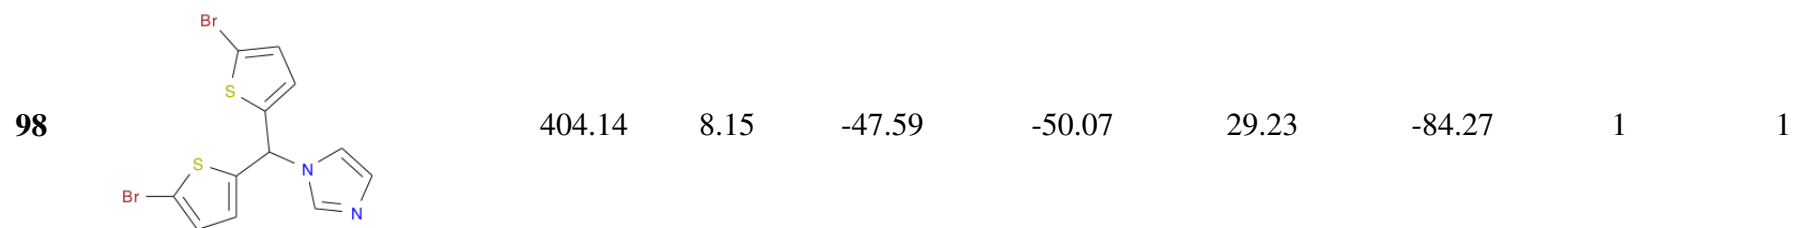

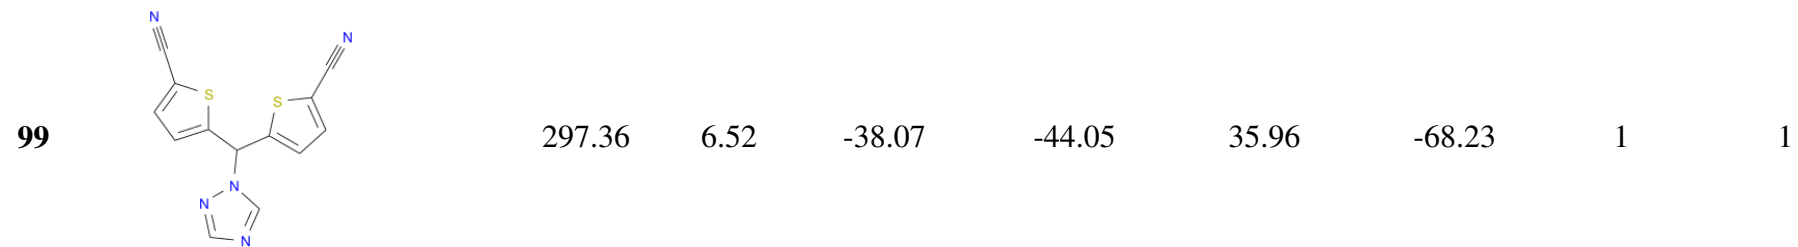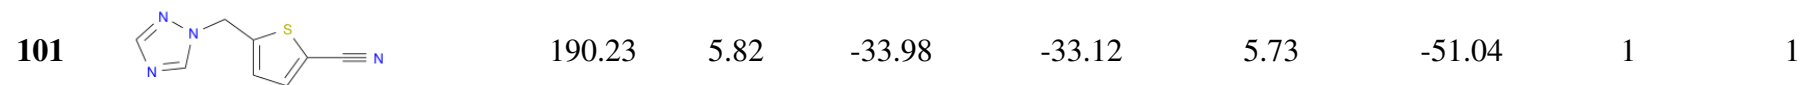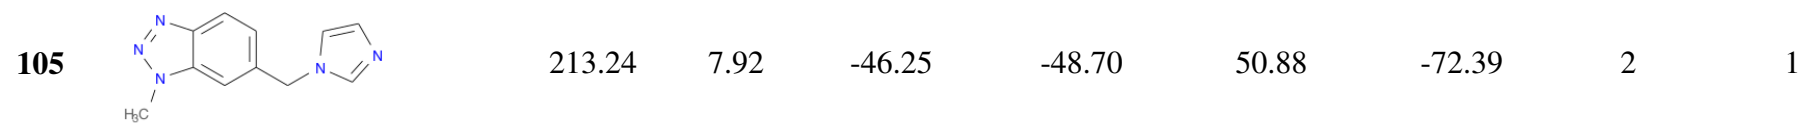

|     |                                                                                    |        |       |        |        |       |        |   |   |
|-----|------------------------------------------------------------------------------------|--------|-------|--------|--------|-------|--------|---|---|
| 106 | 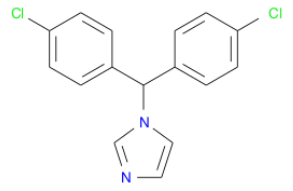  | 303.19 | 10.00 | -58.39 | -53.70 | 52.67 | -79.32 | 2 | 1 |
| 109 |   | 293.37 | 8.77  | -51.21 | -51.11 | 61.60 | -78.24 | 2 | 1 |
| 118 |  | 306.40 | 7.85  | -45.84 | -46.48 | -3.68 | -67.59 | 1 | 1 |

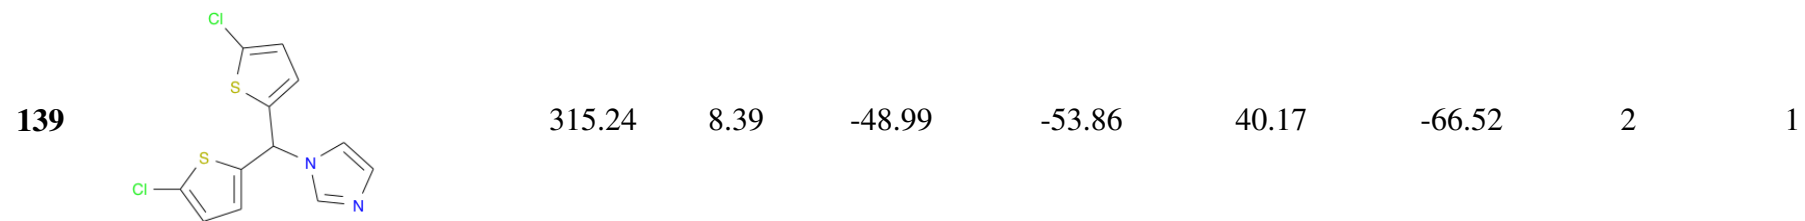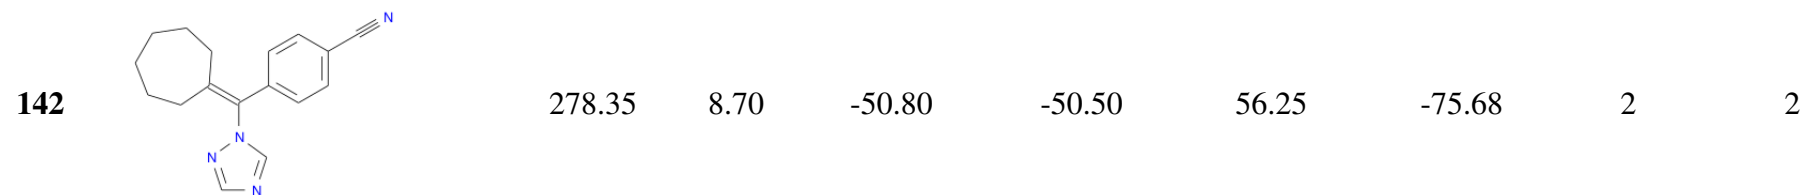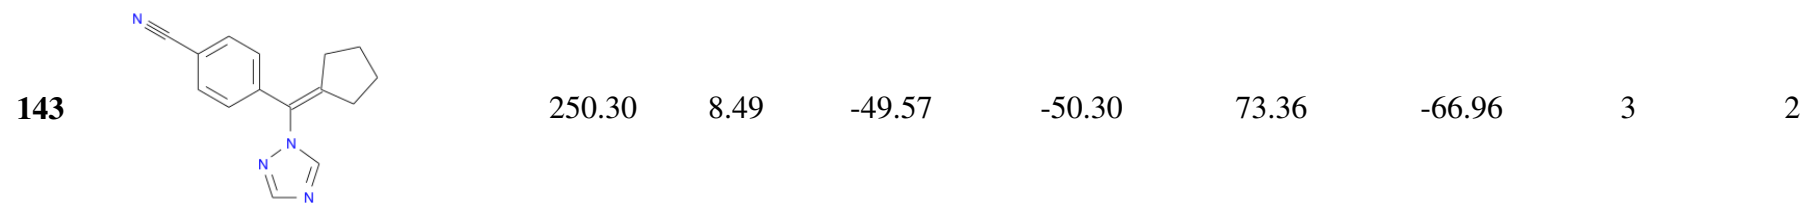

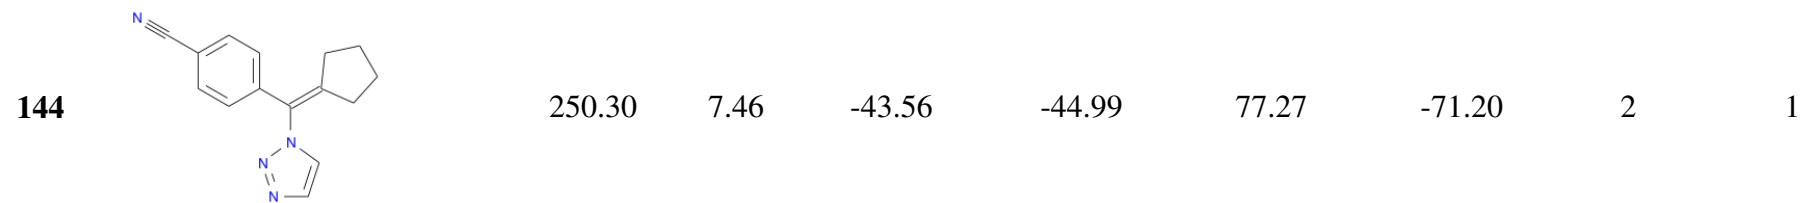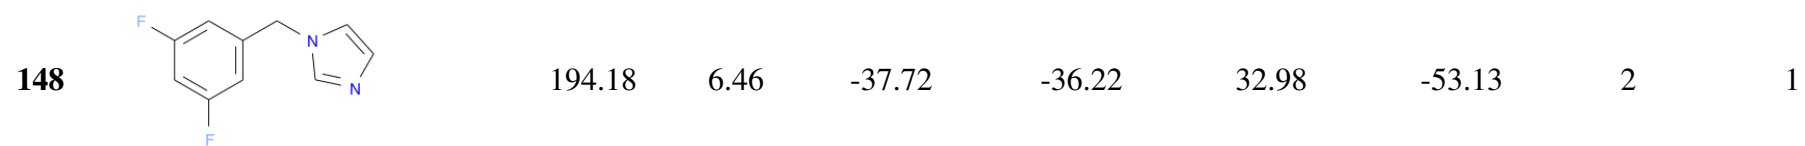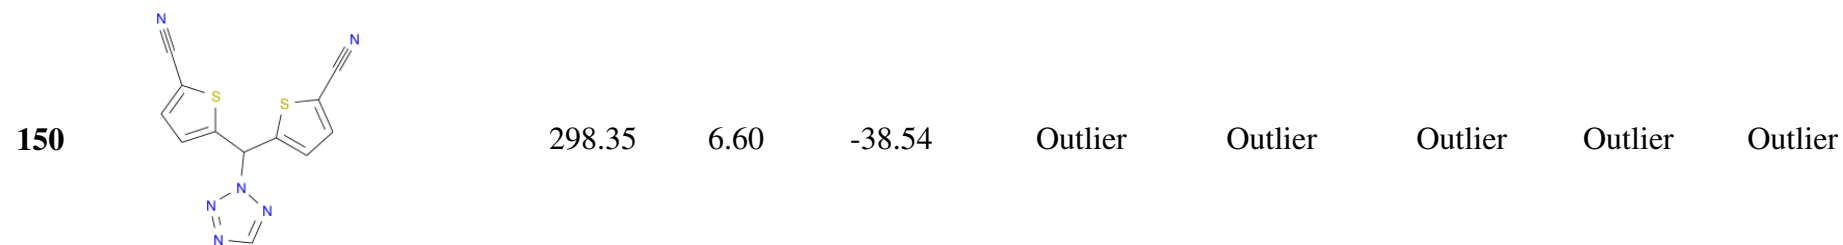

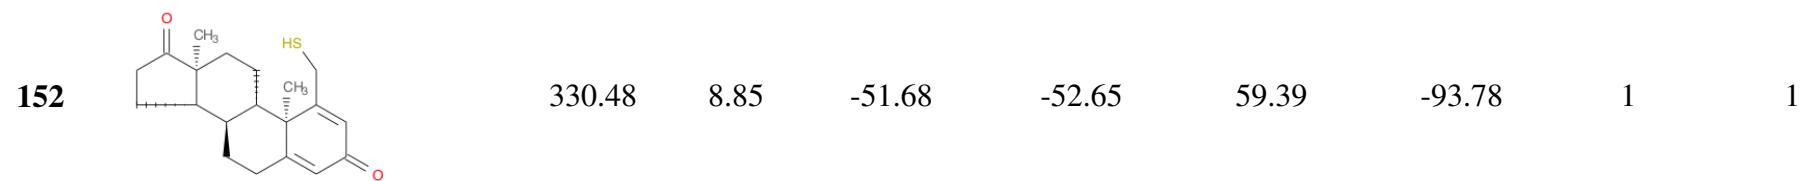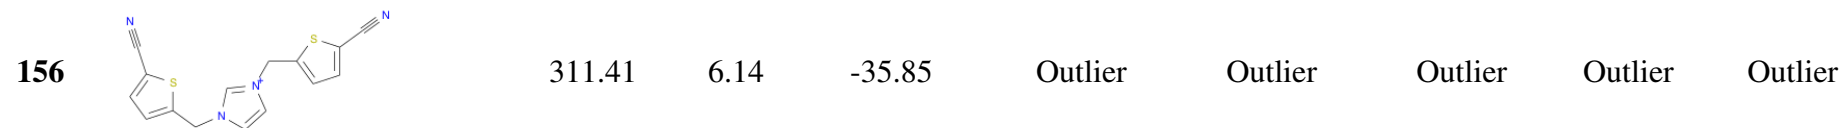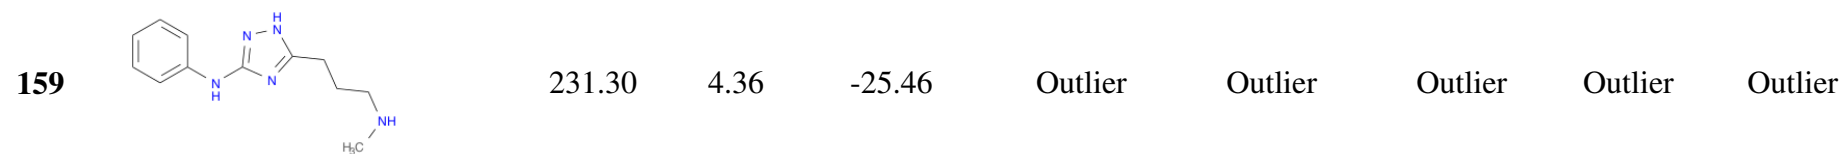

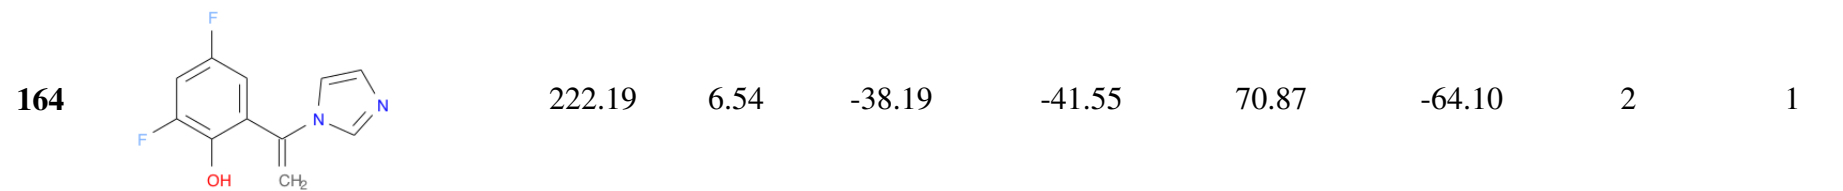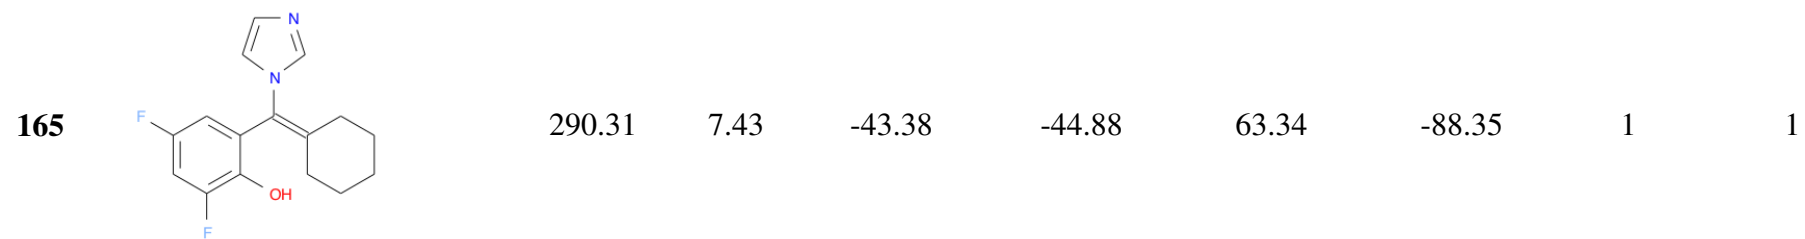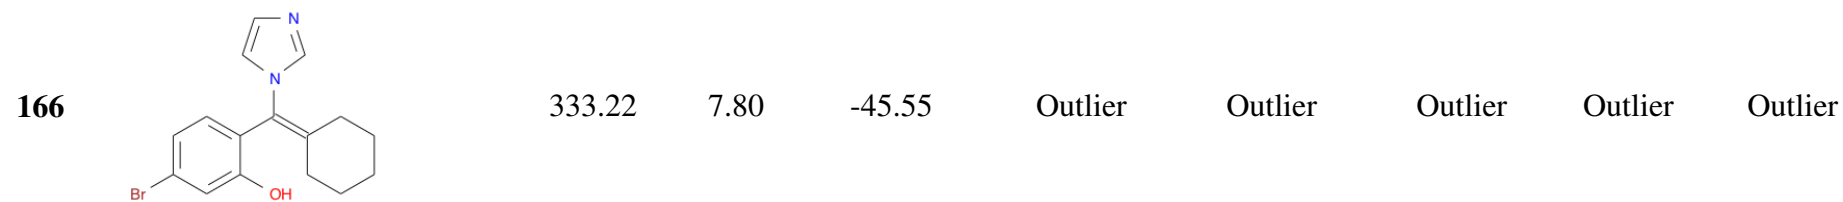



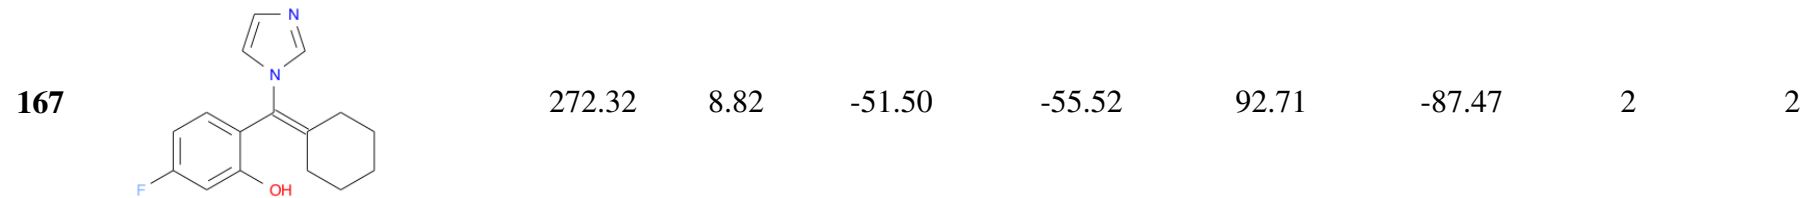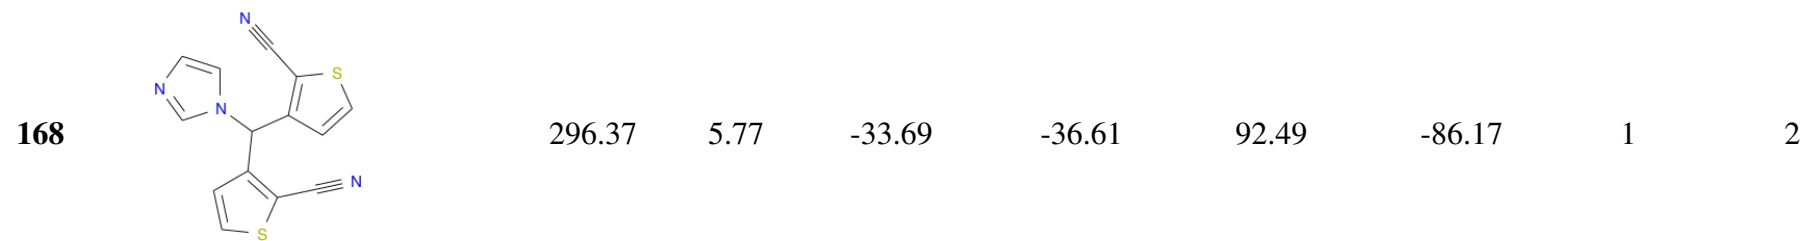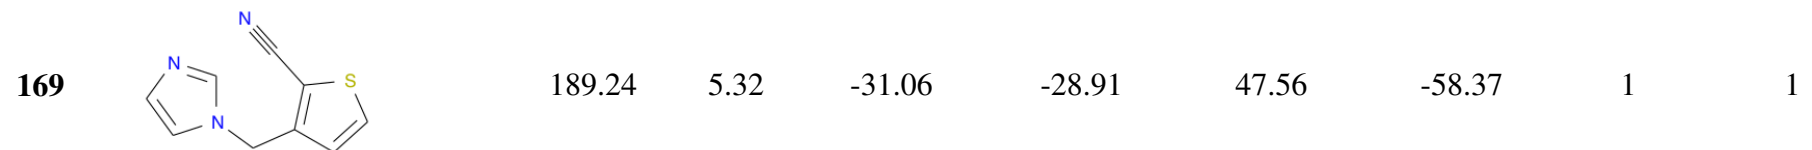

---

**170**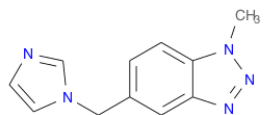

213.34

5.16

-30.13

-32.23

52.72

-65.94

1

1

---

**171**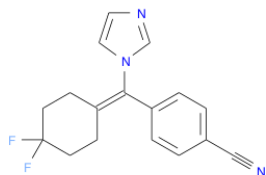

299.32

8.92

-52.09

-52.49

53.65

-78.18

2

2

---

**172**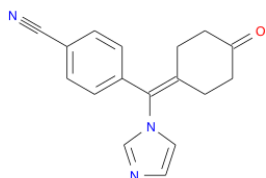

277.32

8.85

-51.68

-49.17

94.49

-79.26

2

2

---

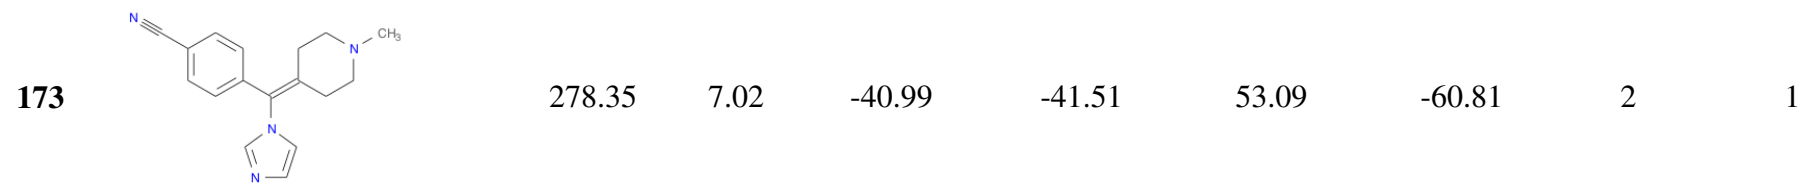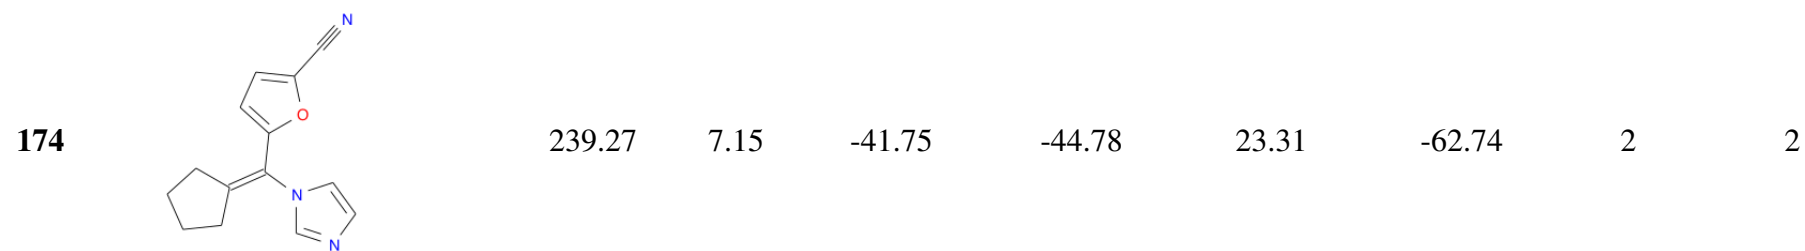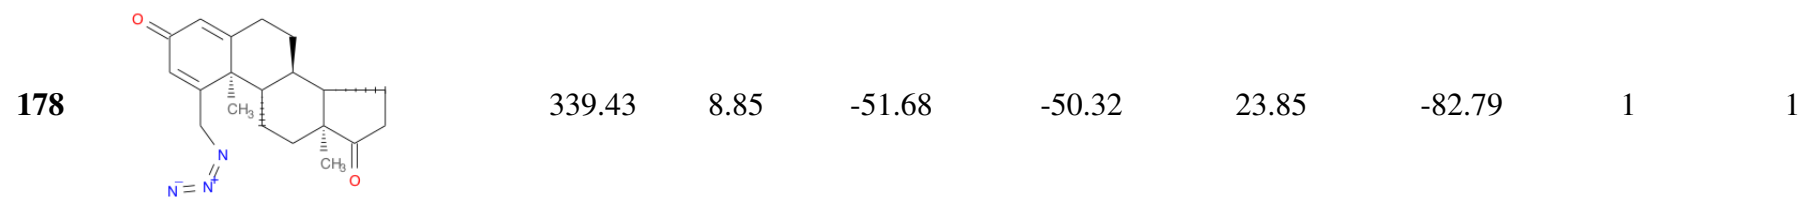

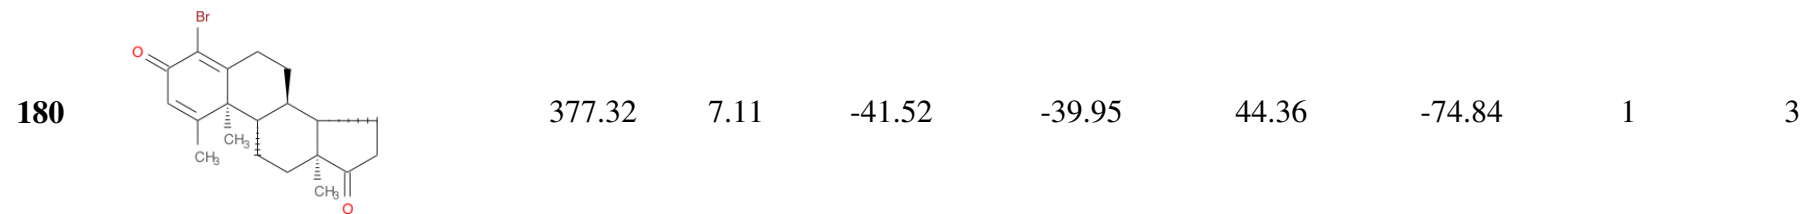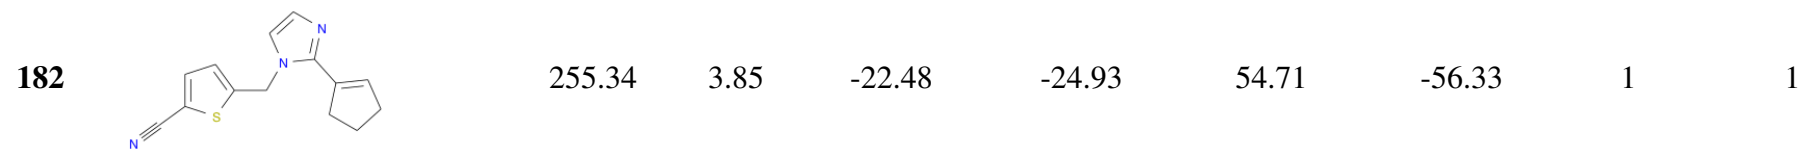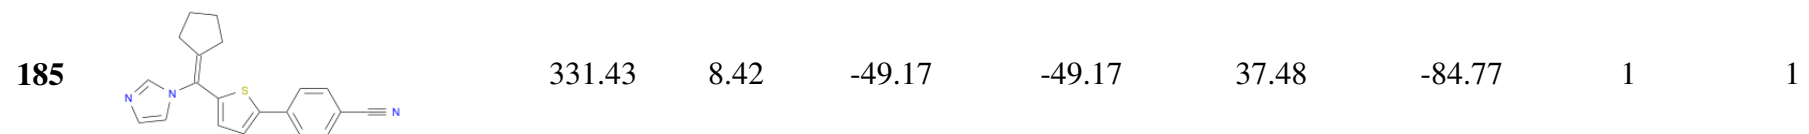

|     |                                                                                    |        |      |        |         |         |         |         |         |
|-----|------------------------------------------------------------------------------------|--------|------|--------|---------|---------|---------|---------|---------|
| 189 |   | 356.46 | 5.68 | -33.17 | Outlier | Outlier | Outlier | Outlier | Outlier |
| 194 |   | 273.35 | 6.02 | -35.15 | -29.74  | 66.43   | -66.99  | 1       | 1       |
| 198 |  | 209.23 | 7.32 | -42.74 | -38.23  | 22.83   | -64.52  | 1       | 1       |

|     |                                                                                    |        |      |        |        |       |        |   |   |
|-----|------------------------------------------------------------------------------------|--------|------|--------|--------|-------|--------|---|---|
| 200 | 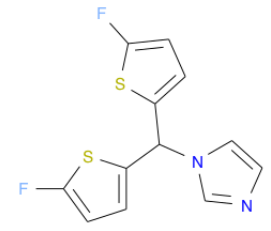  | 282.30 | 7.25 | -42.33 | -44.36 | 44.56 | -81.10 | 1 | 1 |
| 205 |   | 313.40 | 8.52 | -49.75 | -42.64 | 88.38 | -94.10 | 1 | 2 |
| 208 |  | 339.43 | 8.60 | -50.22 | -54.34 | 47.44 | -79.44 | 2 | 2 |

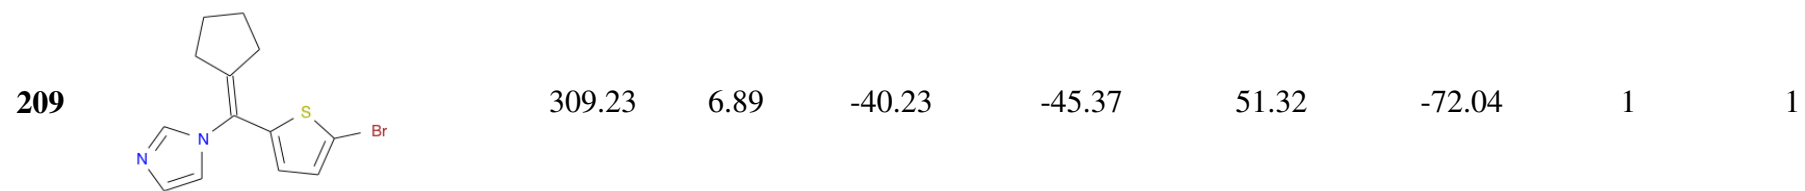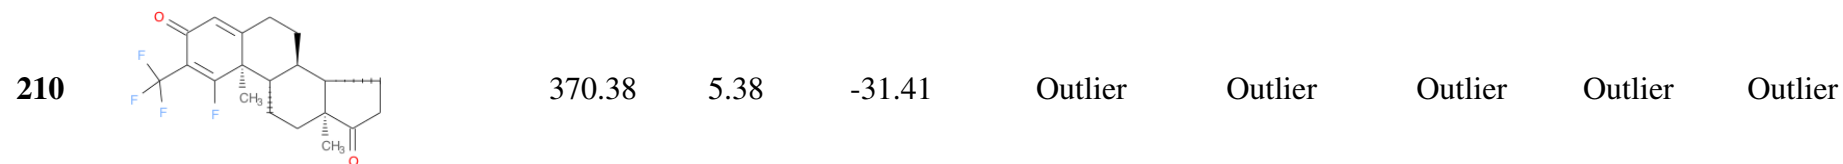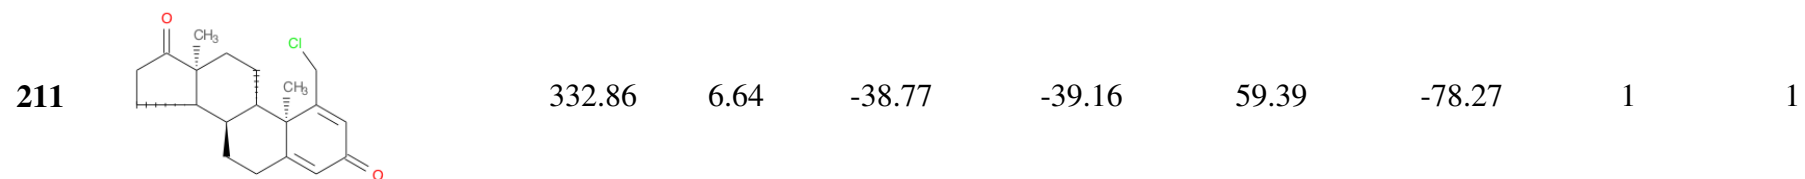

---

**217**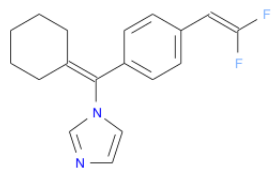

300.35

7.85

-45.84

-48.84

54.35

-66.08

2

1

---

**218**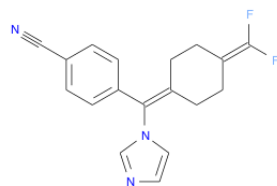

311.33

8.82

-51.50

-55.40

56.25

-71.59

2

1

---

**220**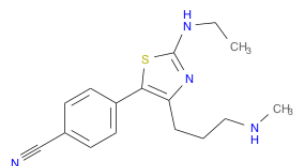

300.42

4.24

-24.76

Outlier

Outlier

Outlier

Outlier

Outlier



---

221

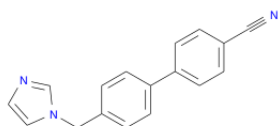

259.31

6.18

-36.09

-34.93

43.15

-66.64

1

1

---

223

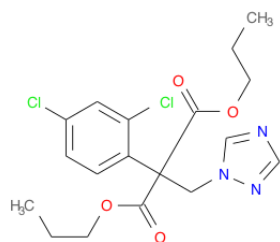

414.28

5.44

-31.76

Outlier

Outlier

Outlier

Outlier

Outlier

---

231

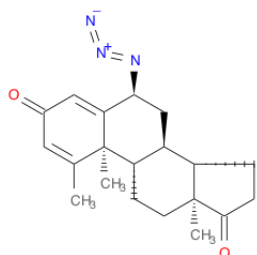

339.43

7.31

-42.68

-44.45

64.26

-87.24

1

2

---

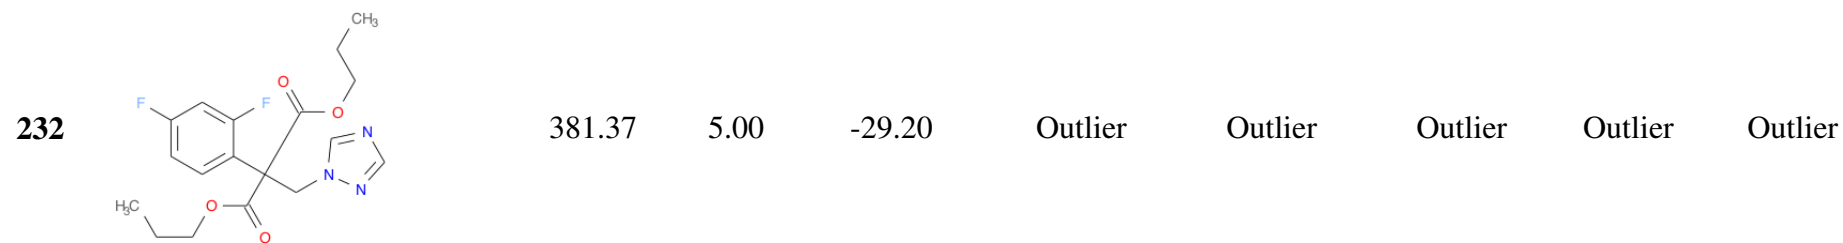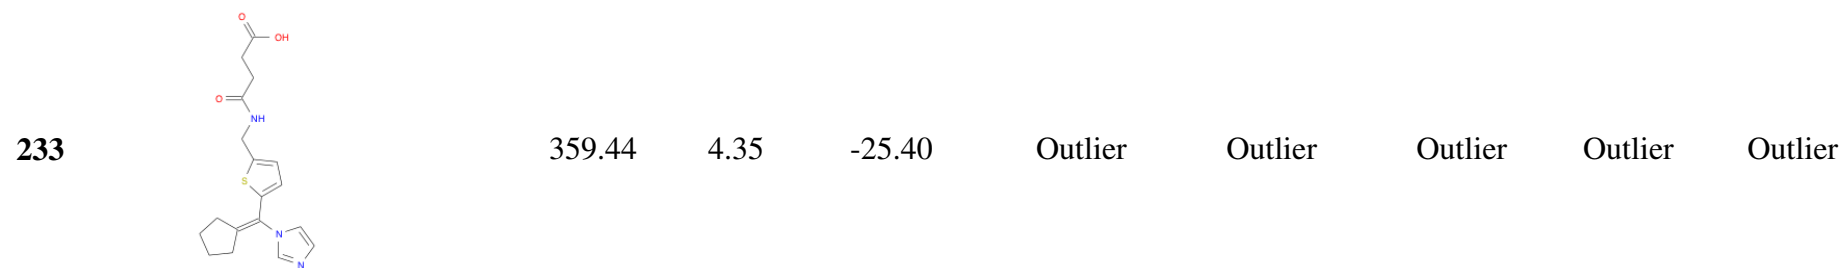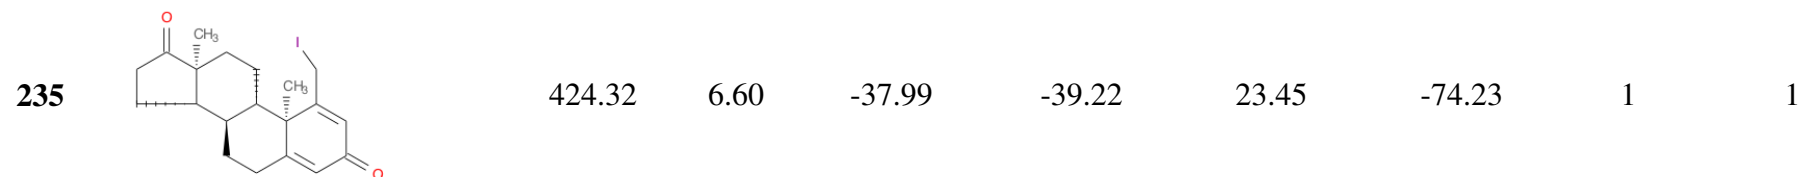

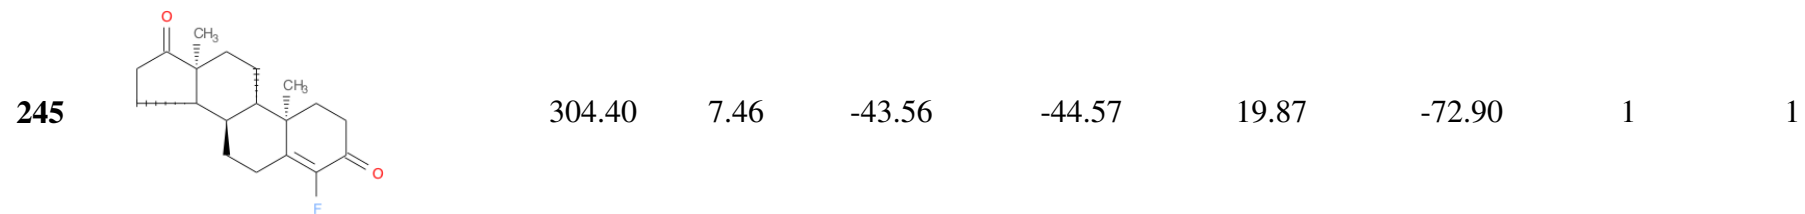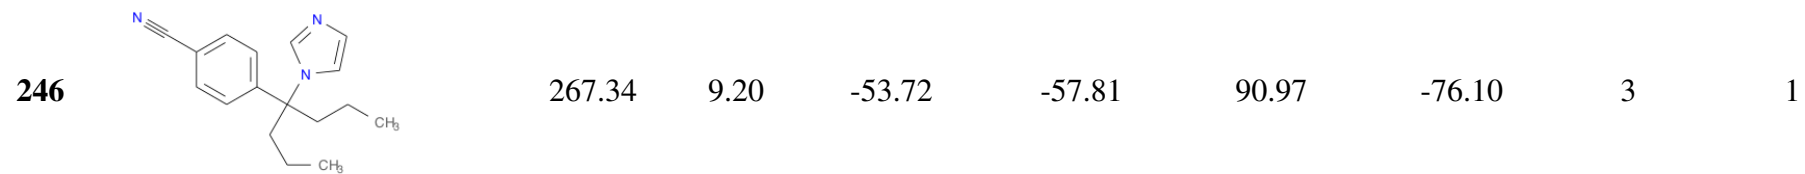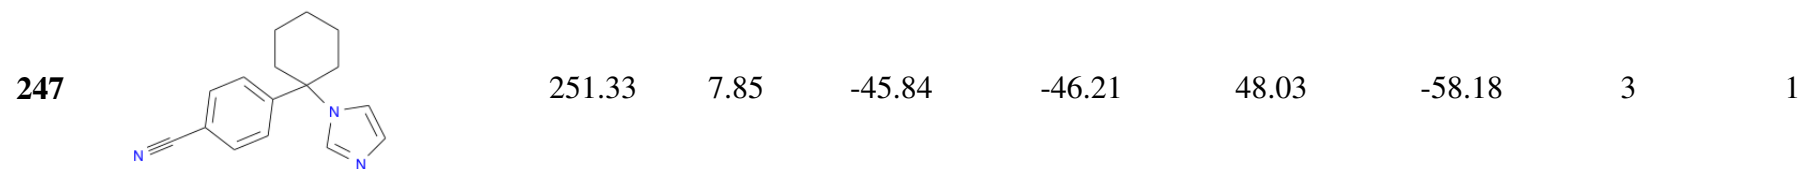

|     |  |        |      |        |        |       |        |   |   |
|-----|--|--------|------|--------|--------|-------|--------|---|---|
| 248 |  | 325.27 | 8.30 | -48.46 | -49.34 | 51.10 | -73.92 | 2 | 2 |
| 250 |  | 288.41 | 8.89 | -51.91 | -50.08 | 34.74 | -71.92 | 2 | 1 |
| 253 |  | 302.38 | 7.04 | -41.11 | -37.66 | 57.48 | -76.12 | 1 | 2 |

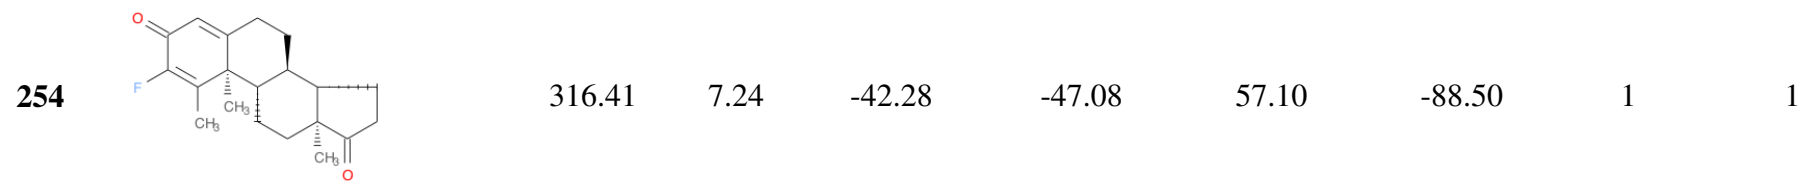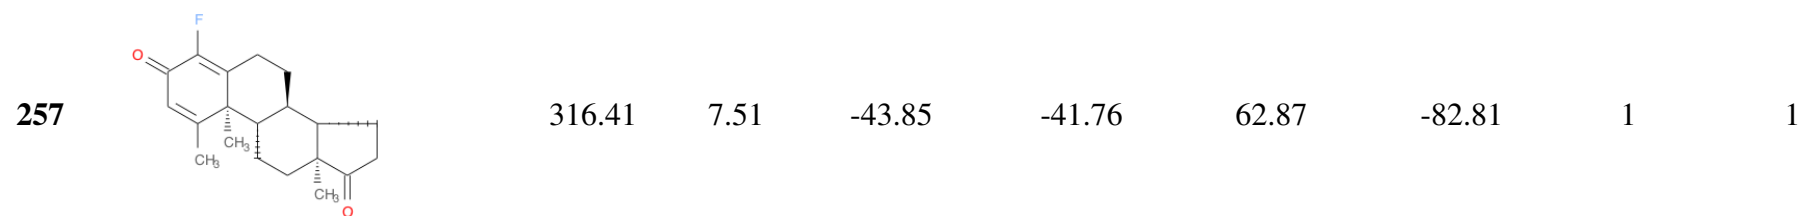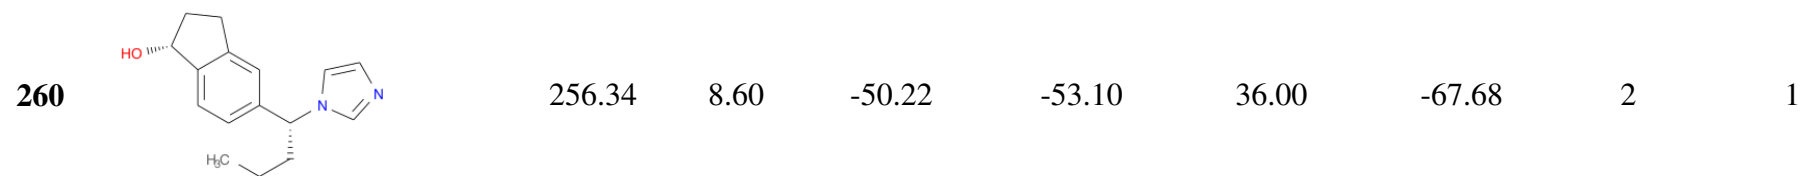

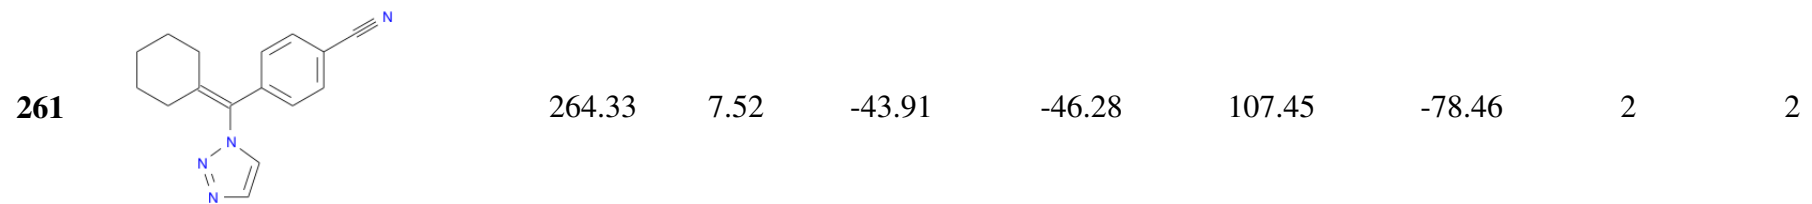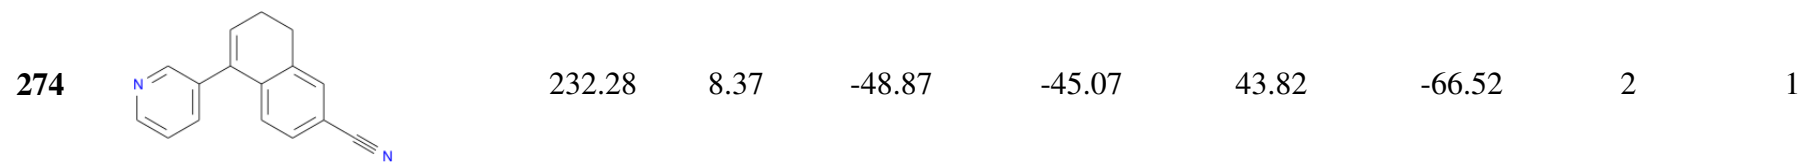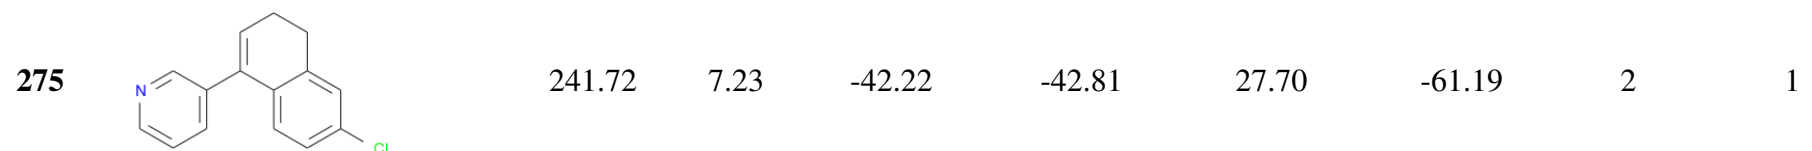

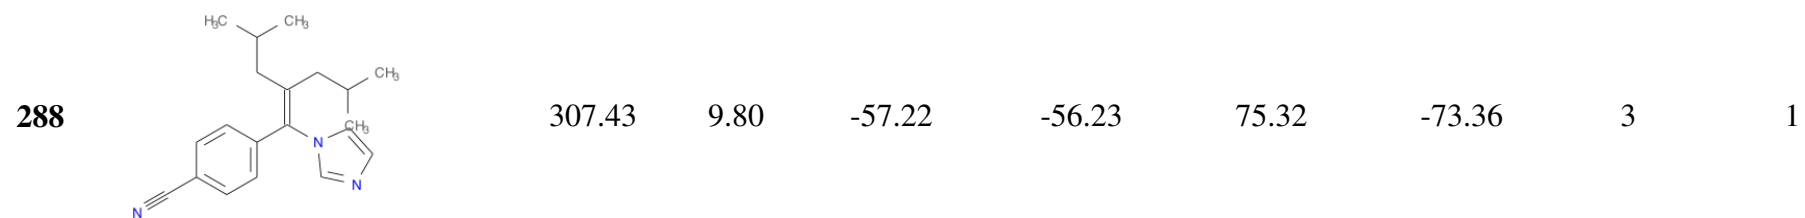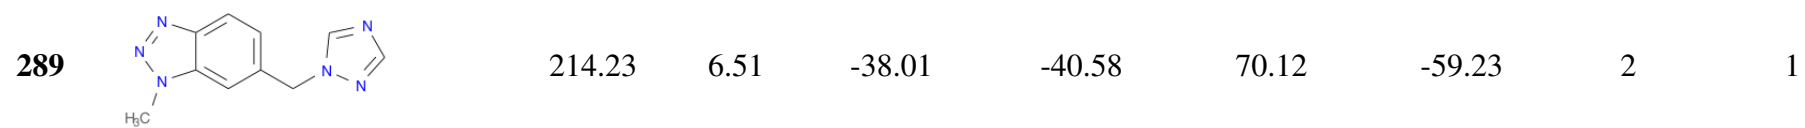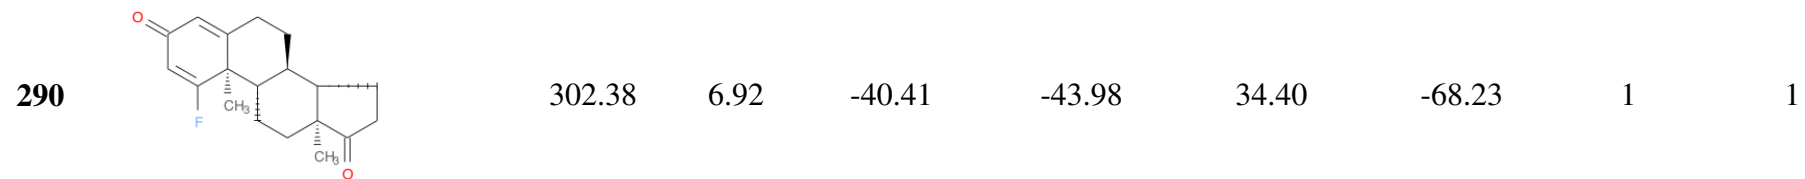

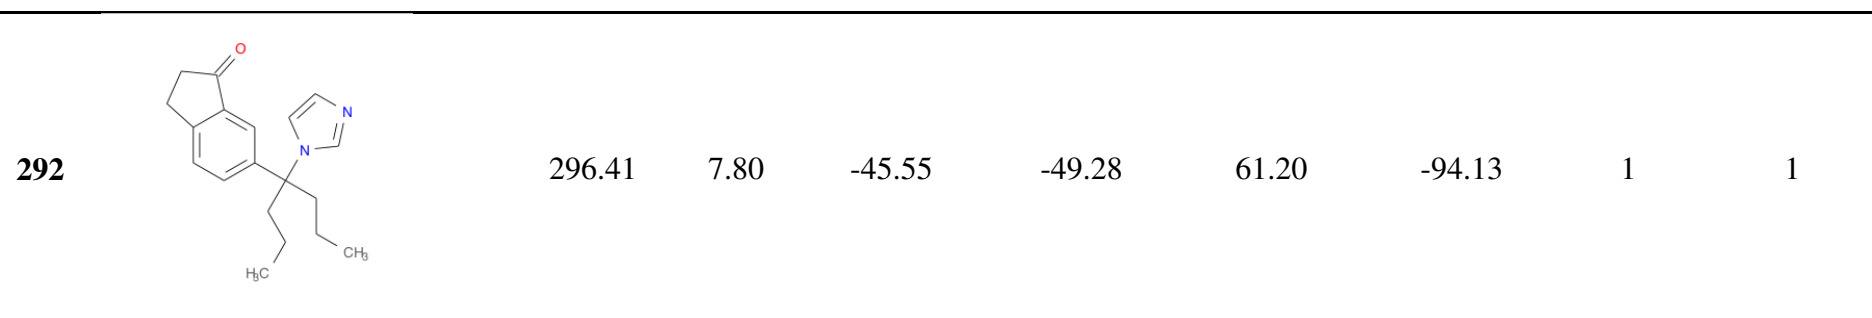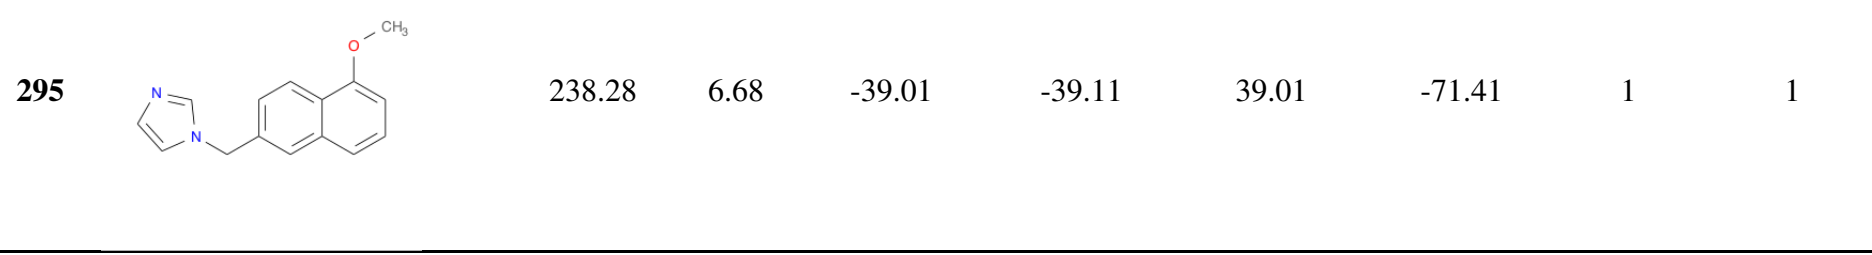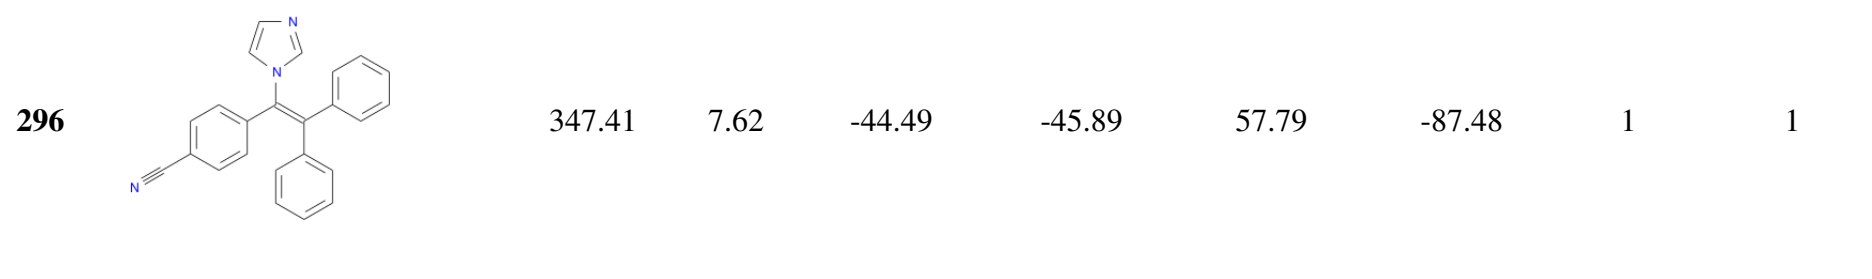



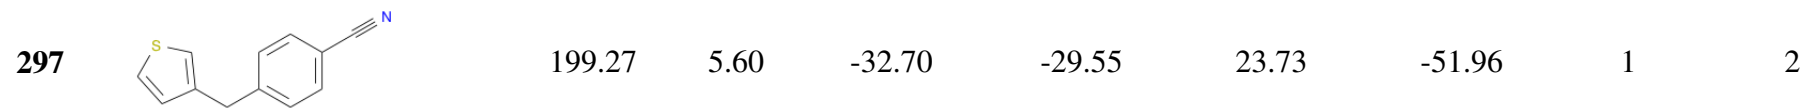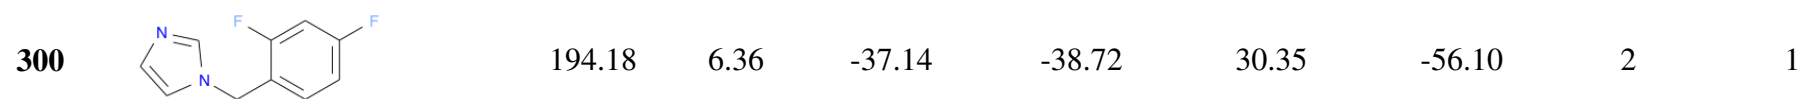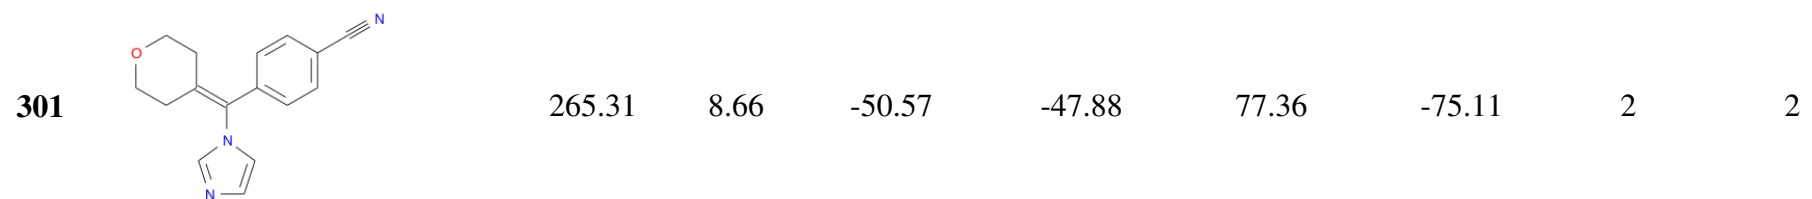

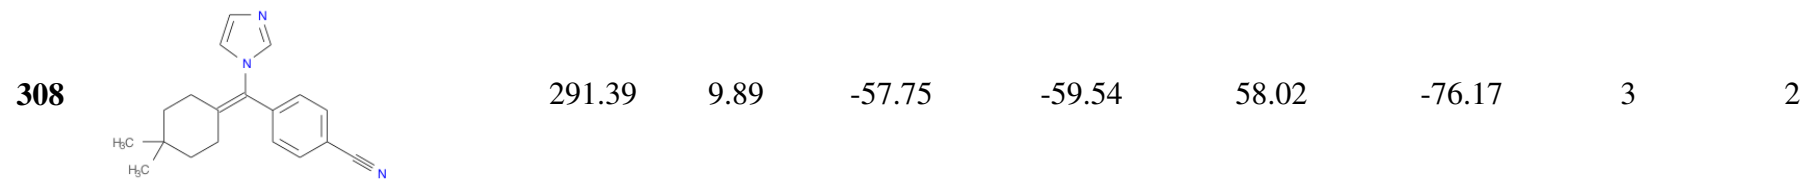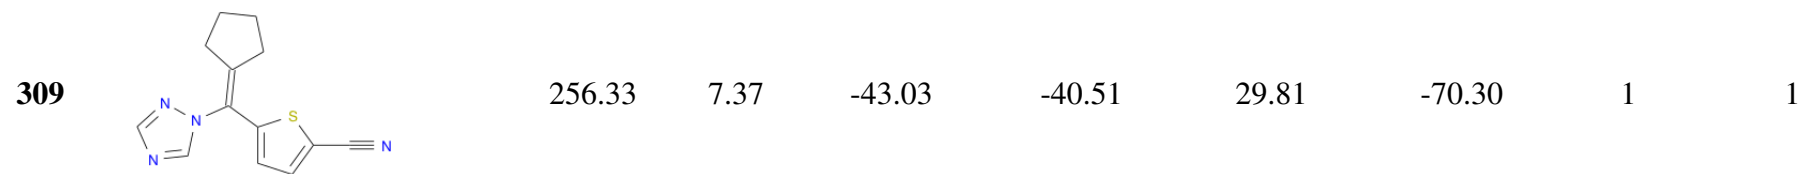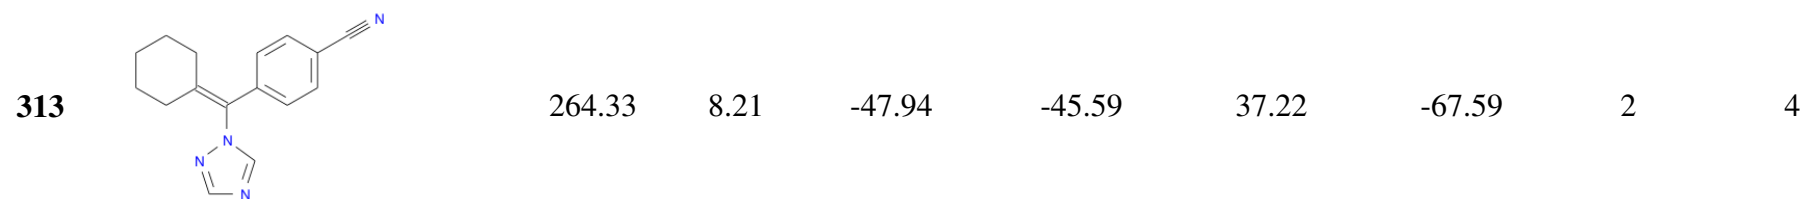

---

**314**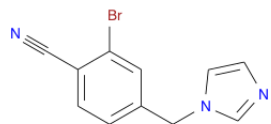

262.11

8.44

-49.28

-49.17

71.91

-65.60

3

1

---

**318**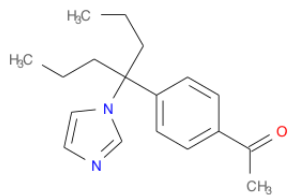

284.40

8.13

-47.47

-49.56

68.71

-76.45

2

4

---

**322**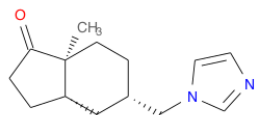

232.32

8.39

-48.99

-52.52

38.67

-63.20

3

2

---

323

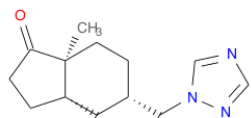

233.31

6.42

-37.49

-35.83

45.38

-68.75

1

2

---

324

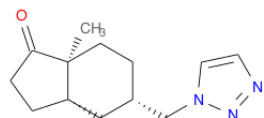

233.31

6.80

-39.71

-46.26

-64.14

-12.72

1

1

---

325

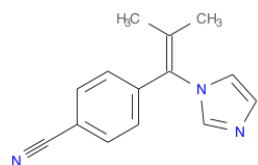

233.37

8.22

-48.00

-47.62

53.14

-60.80

3

2

---

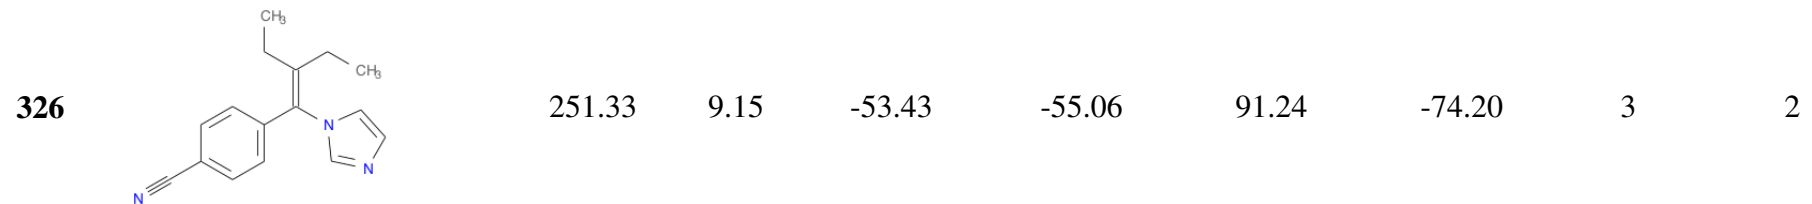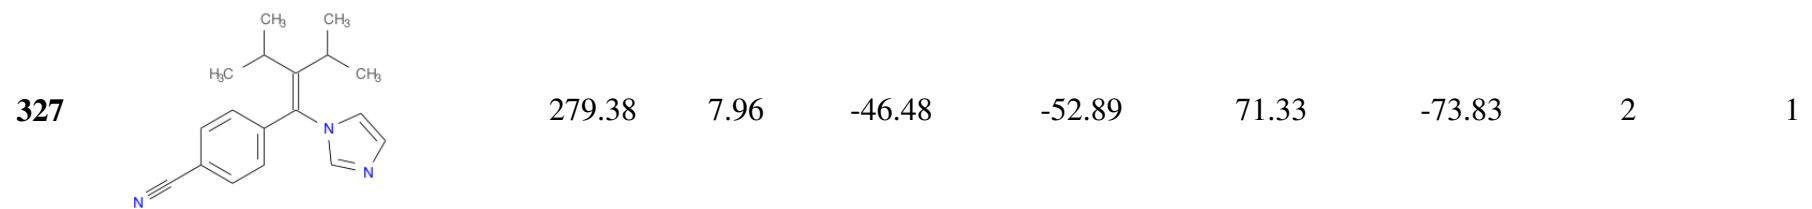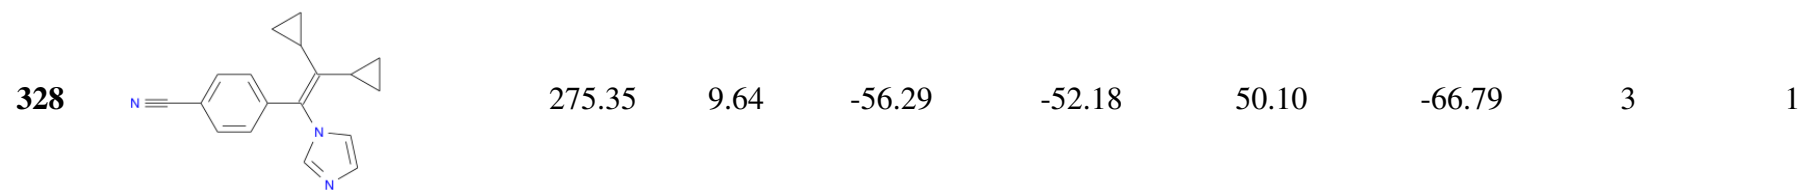

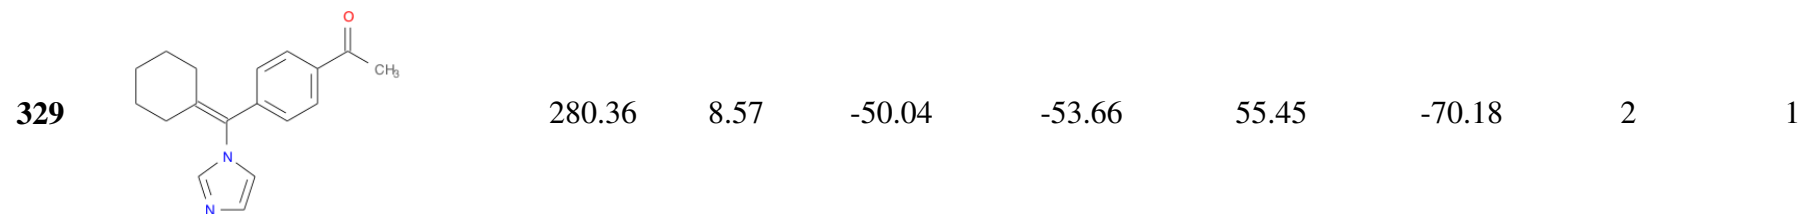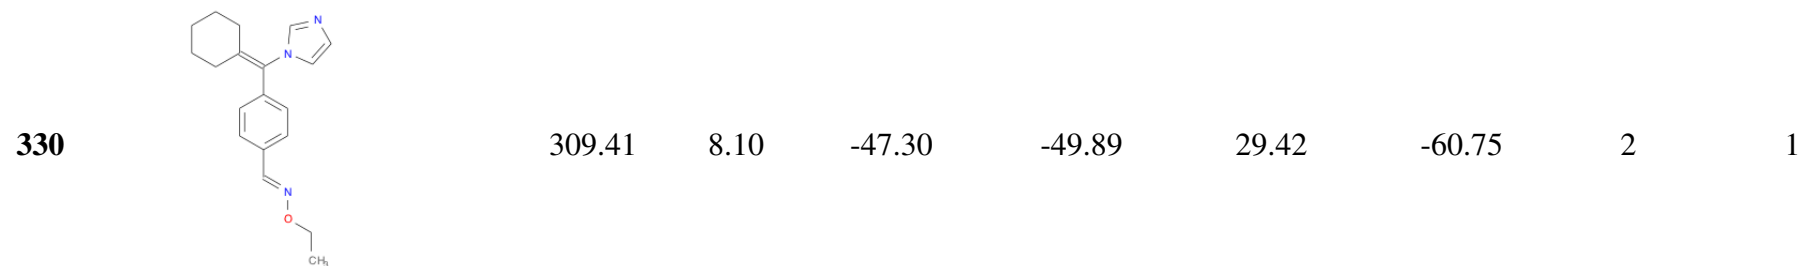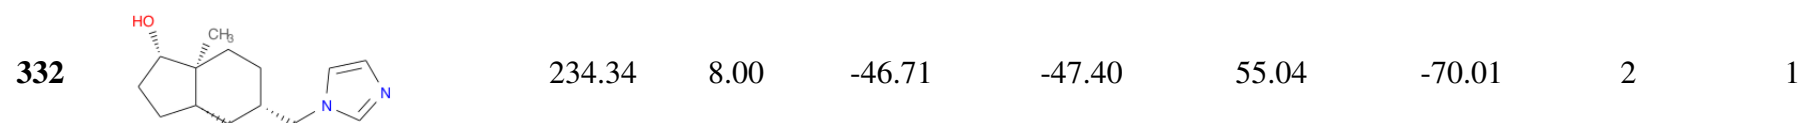

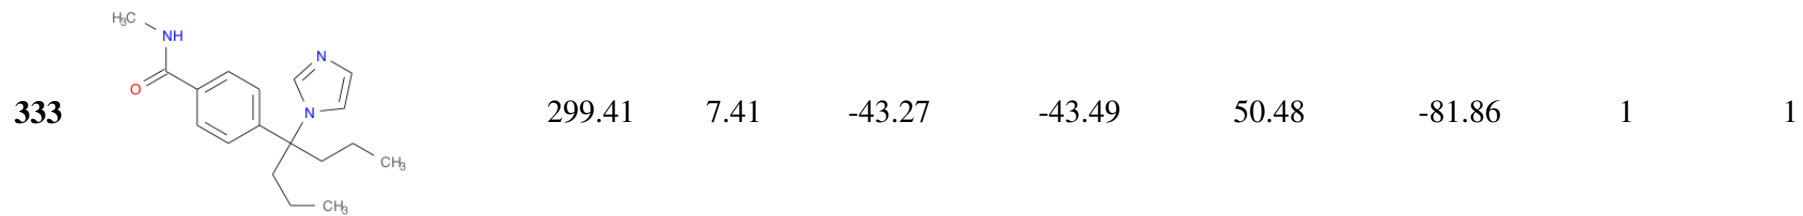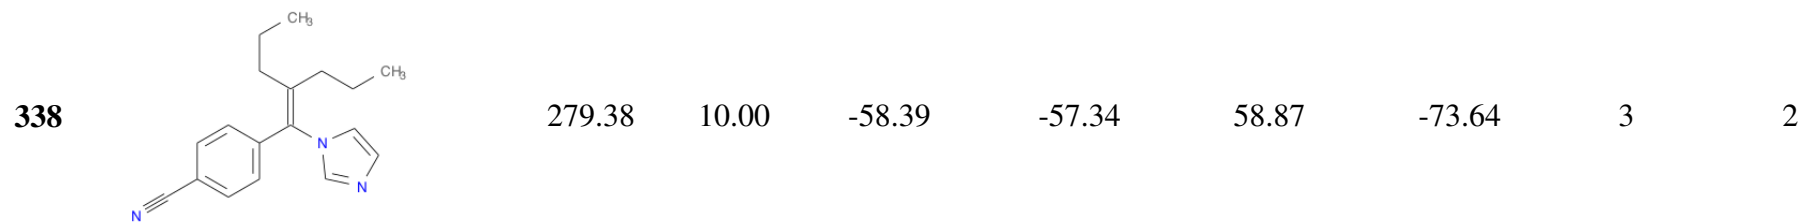

Table S2: Averaged difference in the Coulomb component of the nonbonded protein-ligand interaction energy (in  $\text{kJ}\cdot\text{mol}^{-1}$ , after FFT trajectory filtering) for up to 8 selected docking poses for the dataset of 132 putative aromatase inhibitors represented by the ligand ID (Table S1). The docking poses selected by the Boltzmann weighting scheme during training of the respective model the ligand belongs to (Table S1) are shown as gray shaded cells.

| ID | 1       | 2       | 3       | 4       | 5       | 6       | 7 | 8 |
|----|---------|---------|---------|---------|---------|---------|---|---|
| 2  | -66.244 | -67.544 | -59.492 | -75.539 |         |         |   |   |
| 9  | -75.989 | -78.494 | -73.475 | -75.537 | -76.368 |         |   |   |
| 10 | -71.896 | -70.730 | -75.100 | -78.579 | -70.148 |         |   |   |
| 11 | -52.207 | -47.238 | -54.027 | -49.752 | -43.326 | -48.410 |   |   |
| 12 | -82.942 | -74.142 | -81.858 | -67.144 |         |         |   |   |
| 13 | -61.514 | -57.458 | -51.064 | -49.564 | -70.439 |         |   |   |
| 15 | -48.021 | -53.764 | -52.703 | -51.222 | -58.923 |         |   |   |
| 16 | -67.001 | -71.694 | -84.388 | -79.900 | -80.963 |         |   |   |
| 18 | -59.701 | -60.972 | -58.727 | -57.146 | -67.425 |         |   |   |
| 52 | -71.152 | -59.268 | -74.585 | -60.353 | -71.082 | -66.530 |   |   |
| 53 | -44.541 | -61.814 | -48.386 | -54.466 | -65.478 |         |   |   |
| 54 | -68.319 | -64.338 | -65.711 | -69.410 | -82.935 |         |   |   |
| 55 | -68.407 | -73.584 | -55.445 | -72.582 | -70.115 |         |   |   |
| 56 | -66.413 | -81.208 | -56.599 | -80.679 | -75.435 |         |   |   |
| 57 | -73.390 | -85.065 | -69.221 | -81.148 | -71.405 |         |   |   |
| 59 | -60.356 | -61.323 | -68.246 | -71.838 | -63.153 | -59.601 |   |   |
| 60 | -73.557 | -65.200 | -72.911 | -74.612 | -77.401 |         |   |   |
| 61 | -55.814 | -44.940 | -50.688 | -60.770 | -57.823 |         |   |   |
| 62 | -50.000 | -52.559 | -44.600 | -45.520 | -46.690 |         |   |   |
| 64 | -64.944 | -63.543 | -64.335 | -62.985 | -56.300 |         |   |   |



|     |         |         |         |         |         |         |         |
|-----|---------|---------|---------|---------|---------|---------|---------|
| 65  | -59.501 | -74.585 | -70.063 | -81.174 | -67.731 |         |         |
| 66  | -74.496 | -71.461 | -73.092 | -64.493 | -57.818 |         |         |
| 67  | -67.894 | -69.610 | -61.488 | -70.317 | -63.534 | -58.055 |         |
| 68  | -65.932 | -71.101 | -70.354 | -66.994 | -66.616 | -67.261 |         |
| 69  | -49.146 | -33.851 | -56.363 | -49.565 | -52.107 | -47.804 |         |
| 70  | -67.309 | -77.293 | -62.050 | -58.161 | -64.826 | -64.177 |         |
| 71  | -82.973 | -69.724 | -63.684 | -83.648 | -79.525 |         |         |
| 72  | -74.745 | -59.691 | -58.032 | -62.618 | -77.288 |         |         |
| 73  | -68.176 | -72.729 | -62.492 | -72.341 |         |         |         |
| 74  | -52.073 | -63.602 | -61.292 | -67.386 | -50.464 | -65.803 |         |
| 75  | -62.831 | -62.953 | -73.453 | -65.415 | -74.260 |         |         |
| 76  | -88.392 | -68.238 | -70.119 | -77.823 | -73.985 | -75.569 |         |
| 77  | -72.856 | -72.374 | -64.039 | -76.345 | -78.918 |         |         |
| 78  | -72.326 | -79.970 | -60.166 | -74.739 | -65.422 |         |         |
| 79  | -59.493 | -58.197 | -57.535 | -65.345 | -66.606 |         |         |
| 80  | -76.697 | -75.026 | -74.271 | -77.661 |         |         |         |
| 81  | -73.006 | -78.347 | -91.001 | -71.164 | -87.814 | -81.845 |         |
| 83  | -70.691 | -63.274 | -67.365 | -74.318 | -66.362 | -59.861 |         |
| 84  | -79.160 | -73.315 | -77.137 | -77.224 |         |         |         |
| 85  | -82.984 | -69.545 | -74.458 | -71.792 |         |         |         |
| 87  | -62.140 | -69.072 | -56.311 | -58.543 | -75.534 | -57.208 |         |
| 89  | -57.167 | -58.577 | -64.762 | -64.475 | -58.454 |         |         |
| 90  | -79.580 | -57.635 | -84.322 | -80.253 | -71.636 | -74.560 | -83.877 |
| 94  | -43.535 | -50.353 | -53.067 | -47.099 | -53.272 |         |         |
| 95  | -72.728 | -78.551 | -74.482 | -77.880 | -69.111 |         |         |
| 98  | -84.267 | -79.685 | -70.636 | -72.413 | -67.908 |         |         |
| 99  | -56.490 | -68.787 | -64.104 | -68.230 | -74.743 |         |         |
| 101 | -58.000 | -52.311 | -49.419 | -52.844 | -51.041 |         |         |
| 105 | -49.887 | -67.574 | -72.386 | -61.441 | -58.862 |         |         |
| 106 | -59.420 | -70.842 | -79.324 | -65.907 |         |         |         |

|            |         |         |         |          |         |         |         |
|------------|---------|---------|---------|----------|---------|---------|---------|
| <b>109</b> | -87.133 | -77.525 | -78.244 | -50.587  | -70.531 | -82.857 |         |
| <b>118</b> | -67.429 | -62.643 | -71.602 | -60.128  | -67.587 |         |         |
| <b>139</b> | -57.920 | -66.520 | -78.270 | -59.665  | -61.567 |         |         |
| <b>142</b> | -75.990 | -66.448 | -67.112 | -67.358  | -75.410 |         |         |
| <b>143</b> | -67.843 | -64.999 | -66.228 | -64.586  | -64.096 |         |         |
| <b>144</b> | -64.925 | -71.196 | -63.624 | -62.992  | -65.125 |         |         |
| <b>148</b> | -46.131 | -44.750 | -37.505 | -53.135  |         |         |         |
| <b>150</b> | -61.610 | -73.179 | -66.463 | -70.461  | -86.169 |         |         |
| <b>152</b> | -76.790 | -79.635 | -81.960 | -77.908  | -93.779 |         |         |
| <b>156</b> | -61.193 | -65.848 | -58.603 | -57.687  | -61.617 |         |         |
| <b>159</b> | -70.525 |         | -75.222 | -67.801  | -50.363 |         |         |
| <b>164</b> | -49.219 | -68.049 | -53.453 | -60.410  | -58.694 |         |         |
| <b>165</b> | -84.263 | -88.355 | -79.945 | -85.519  | -72.645 |         |         |
| <b>166</b> | -61.568 | -81.837 |         | -69.073  | -71.738 |         |         |
| <b>167</b> | -63.138 | -85.476 | -90.115 | -68.640  | -69.274 | -53.621 |         |
| <b>168</b> | -87.051 | -87.206 | -67.082 | -73.639  | -85.118 |         |         |
| <b>169</b> | -58.704 | -57.658 | -50.277 | -40.883  |         |         |         |
| <b>170</b> | -68.998 | -69.469 | -55.781 | -60.028  | -65.944 |         |         |
| <b>171</b> | -78.182 | -73.211 | -57.779 | -66.348  | -76.488 | -76.408 |         |
| <b>172</b> | -79.369 | -79.181 | -75.758 | -74.041  | -72.639 | -75.385 |         |
| <b>173</b> | -60.810 | -62.454 | -67.717 | -63.528  | -71.082 | -67.122 |         |
| <b>174</b> | -62.170 | -66.736 | -58.120 | -62.296  | -57.235 | -54.578 | -55.568 |
| <b>178</b> | -87.075 | -89.990 | -77.173 | -82.785  | -80.626 |         |         |
| <b>180</b> | -68.486 | -81.734 | -76.494 | -78.639  | -78.365 |         |         |
| <b>182</b> | -62.117 | -70.459 | -68.484 | -57.298  | -56.329 |         |         |
| <b>185</b> | -66.924 | -67.050 | -75.448 | -84.861  | -76.719 | -71.164 | -84.503 |
| <b>189</b> | -77.565 | -99.151 | -56.304 | -101.593 | -99.511 |         |         |
| <b>194</b> | -71.281 | -66.986 | -64.541 | -71.852  |         |         |         |
| <b>198</b> | -61.399 | -57.348 | -59.796 | -59.947  | -64.522 |         |         |
| <b>200</b> | -76.391 | -81.102 | -69.171 | -71.719  | -71.593 |         |         |

|            |         |          |         |         |         |         |         |         |
|------------|---------|----------|---------|---------|---------|---------|---------|---------|
| <b>205</b> | -90.179 | -63.884  | -65.333 | -74.851 | -78.249 | -94.100 | -87.836 | -79.758 |
| <b>208</b> | -68.174 | -70.303  | -79.684 | -72.061 | -67.432 | -79.162 |         |         |
| <b>209</b> | -75.787 | -73.786  | -63.457 | -67.924 | -64.703 | -72.045 |         |         |
| <b>210</b> | -90.592 | -63.134  | -79.491 | -91.284 | -72.962 |         |         |         |
| <b>211</b> | -88.988 | -78.270  | -76.915 | -79.908 | -84.299 |         |         |         |
| <b>217</b> | -63.268 | -67.031  | -58.211 | -72.838 | -66.081 |         |         |         |
| <b>218</b> | -65.973 | -75.628  | -86.452 | -67.883 | -66.930 | -71.587 |         |         |
| <b>220</b> | -62.936 | -81.708  | -83.657 | -62.891 | -76.427 |         |         |         |
| <b>221</b> | -56.650 | -53.921  | -66.638 | -48.505 |         |         |         |         |
| <b>223</b> | -97.112 | -92.904  | -87.488 | -93.191 | -80.234 |         |         |         |
| <b>231</b> | -93.859 | -73.673  | -86.675 | -86.753 | -85.223 |         |         |         |
| <b>232</b> | -96.106 | -108.064 | -87.471 | -79.090 | -99.950 |         |         |         |
| <b>233</b> | -76.861 | -82.685  | -89.850 | -70.678 | -75.320 | -89.093 |         |         |
| <b>245</b> | -75.595 | -54.523  | -76.962 | -72.895 | -72.892 |         |         |         |
| <b>246</b> | -76.105 | -76.297  | -66.022 | -67.288 | -71.110 | -78.954 |         |         |
| <b>247</b> | -59.802 | -72.123  | -81.919 | -58.179 | -59.463 |         |         |         |
| <b>248</b> | -70.005 | -69.686  | -68.480 | -73.255 | -74.451 |         |         |         |
| <b>250</b> | -67.528 | -73.004  | -70.451 | -71.917 | -71.651 |         |         |         |
| <b>253</b> | -76.560 | -58.500  | -68.070 | -69.256 | -83.073 |         |         |         |
| <b>254</b> | -62.219 | -79.388  | -68.926 | -89.316 | -83.823 |         |         |         |
| <b>257</b> | -87.846 | -53.399  | -76.823 | -64.111 | -73.616 |         |         |         |
| <b>260</b> | -74.295 | -85.242  | -67.682 | -65.897 | -74.315 | -64.208 |         |         |
| <b>261</b> | -68.154 | -67.123  | -78.455 | -65.102 | -60.365 | -72.104 |         |         |
| <b>274</b> | -60.223 | -66.516  | -55.317 | -64.603 | -48.580 |         |         |         |
| <b>275</b> | -61.191 | -44.164  | -58.458 | -55.576 | -53.845 |         |         |         |
| <b>288</b> | -74.580 | -62.089  | -92.566 | -73.365 | -88.723 |         |         |         |
| <b>289</b> | -62.641 | -62.761  | -63.850 | -59.229 | -62.556 |         |         |         |
| <b>290</b> | -63.997 | -68.231  | -55.386 | -85.533 | -71.209 |         |         |         |
| <b>292</b> | -82.889 | -94.133  | -76.668 | -71.577 | -80.083 |         |         |         |
| <b>295</b> | -71.414 | -50.748  | -59.729 | -58.058 | -59.758 | -54.007 |         |         |

|            |         |         |         |         |         |         |         |
|------------|---------|---------|---------|---------|---------|---------|---------|
| <b>296</b> | -68.457 | -70.897 | -84.567 | -77.284 | -76.726 | -87.484 | -78.573 |
| <b>297</b> | -50.871 | -52.939 | -45.875 | -53.720 | -45.975 |         |         |
| <b>300</b> | -49.558 | -40.130 | -56.102 | -50.335 | -50.660 | -49.746 |         |
| <b>301</b> | -71.797 | -71.145 | -69.906 | -67.788 | -74.431 | -76.086 |         |
| <b>308</b> | -74.933 | -70.021 | -78.085 | -74.330 | -72.160 |         |         |
| <b>309</b> | -68.514 | -71.125 | -70.299 | -74.276 | -69.826 |         |         |
| <b>313</b> | -70.038 | -70.426 | -67.592 | -68.807 | -67.627 |         |         |
| <b>314</b> | -55.484 | -48.730 | -56.243 | -65.595 | -53.458 | -54.056 |         |
| <b>318</b> | -75.767 | -78.968 | -77.236 | -75.343 | -74.753 | -69.859 |         |
| <b>322</b> | -62.045 | -64.031 | -69.750 | -63.169 | -65.127 |         |         |
| <b>323</b> | -67.348 | -72.539 | -68.656 | -60.592 | -63.591 |         |         |
| <b>324</b> | -64.917 | -61.639 | -70.656 | -64.138 | -64.741 |         |         |
| <b>325</b> | -56.824 | -55.356 | -62.386 | -55.878 | -44.875 | -53.146 |         |
| <b>326</b> | -61.438 | -62.788 | -75.720 | -59.702 | -67.316 | -70.873 |         |
| <b>327</b> | -69.833 | -61.800 | -78.632 | -73.826 |         |         |         |
| <b>328</b> | -59.031 | -68.110 | -66.793 | -56.068 | -52.935 | -57.677 |         |
| <b>329</b> | -70.176 | -66.387 | -68.800 | -82.439 | -67.915 |         |         |
| <b>330</b> | -78.063 | -60.751 | -81.802 | -62.964 | -67.344 | -68.399 |         |
| <b>332</b> | -61.992 | -68.490 | -70.007 | -63.367 | -77.319 |         |         |
| <b>333</b> | -81.857 | -66.597 | -67.822 | -75.783 | -79.074 | -65.135 |         |
| <b>338</b> | -60.549 | -73.602 | -71.570 | -75.205 | -73.693 |         |         |

Table S3: Averaged difference in the Van der Waals component of the nonbonded protein-ligand interaction energy (in  $\text{kJ}\cdot\text{mol}^{-1}$ , after FFT trajectory filtering) for up to 8 selected docking poses for the dataset of 132 putative aromatase inhibitors represented by the ligand ID (Table S1). The docking poses selected by the Boltzmann weighting scheme during training of the respective model the ligand belongs to (Table S1) are shown as gray shaded cells.

| <b>ID</b> | <b>1</b> | <b>2</b> | <b>3</b> | <b>4</b> | <b>5</b> | <b>6</b> | <b>7</b> | <b>8</b> |
|-----------|----------|----------|----------|----------|----------|----------|----------|----------|
| <b>2</b>  | 60.995   | 79.554   | 59.724   | 46.370   |          |          |          |          |
| <b>9</b>  | 81.778   | 46.958   | 66.355   | 75.820   | 28.326   |          |          |          |
| <b>10</b> | 45.536   | 36.321   | 65.194   | 61.565   | 59.612   |          |          |          |
| <b>11</b> | 51.995   | 4.421    | 79.381   | 76.385   | 50.802   | 39.988   |          |          |
| <b>12</b> | 98.039   | 84.206   | 66.124   | 66.649   |          |          |          |          |
| <b>13</b> | 64.808   | 92.983   | 45.151   | 57.286   | 59.974   |          |          |          |
| <b>15</b> | 73.572   | 59.530   | 59.223   | 66.217   | 44.755   |          |          |          |
| <b>16</b> | 53.681   | 83.247   | 87.017   | 86.150   | 108.174  |          |          |          |
| <b>18</b> | 42.177   | 61.965   | 54.201   | 43.911   | 77.098   |          |          |          |
| <b>52</b> | 72.890   | 49.334   | 64.050   | 41.075   | 85.417   | 39.322   |          |          |
| <b>53</b> | 46.307   | 69.916   | 40.309   | 19.919   | 51.678   |          |          |          |
| <b>54</b> | 46.501   | 55.271   | 67.723   | 87.178   | 81.619   |          |          |          |
| <b>55</b> | 38.130   | 51.825   | 47.930   | 55.998   | 65.464   |          |          |          |
| <b>56</b> | 67.009   | 65.375   | 53.227   | 78.267   | 57.800   |          |          |          |
| <b>57</b> | 60.828   | 83.965   | 41.162   | 81.298   | 65.154   |          |          |          |
| <b>59</b> | 41.720   | 78.590   | 60.538   | 74.168   | 56.739   | 56.597   |          |          |
| <b>60</b> | 53.104   | 69.692   | 64.403   | 56.993   | 59.691   |          |          |          |
| <b>61</b> | 58.646   | 55.311   | 61.065   | 41.485   | 36.245   |          |          |          |
| <b>62</b> | 42.025   | 29.673   | 26.821   | 29.899   | 38.704   |          |          |          |
| <b>64</b> | 43.715   | 57.874   | 40.352   | 49.864   | 47.913   |          |          |          |

|            |         |        |        |        |        |        |        |
|------------|---------|--------|--------|--------|--------|--------|--------|
| <b>65</b>  | 46.885  | 58.847 | 80.919 | 89.487 | 49.270 |        |        |
| <b>66</b>  | 68.958  | 45.425 | 75.154 | 43.491 | 31.270 |        |        |
| <b>67</b>  | 73.403  | 47.127 | 63.111 | 62.102 | 61.970 | 34.296 |        |
| <b>68</b>  | 68.423  | 66.889 | 38.790 | 74.412 | 49.101 | 43.065 |        |
| <b>69</b>  | 59.604  | 23.323 | 73.047 | 42.198 | 44.616 | 35.614 |        |
| <b>70</b>  | 56.677  | 82.303 | 51.915 | 50.251 | 83.744 | 40.962 |        |
| <b>71</b>  | 82.155  | 45.148 | 38.595 | 93.441 | 62.603 |        |        |
| <b>72</b>  | 70.555  | 48.236 | 26.214 | 47.805 | 86.319 |        |        |
| <b>73</b>  | 77.069  | 20.304 | 43.184 | 54.082 |        |        |        |
| <b>74</b>  | 58.416  | 66.651 | 21.772 | 56.640 | 30.745 | 57.965 |        |
| <b>75</b>  | 41.609  | 57.139 | 34.744 | 68.339 | 72.529 |        |        |
| <b>76</b>  | 109.104 | 52.009 | 16.215 | 60.649 | 48.125 | 61.978 |        |
| <b>77</b>  | 74.960  | 79.503 | 78.774 | 86.856 | 82.231 |        |        |
| <b>78</b>  | 78.586  | 49.058 | 61.815 | 55.287 | 17.850 |        |        |
| <b>79</b>  | 25.421  | 21.267 | 44.523 | 59.105 | 52.224 |        |        |
| <b>80</b>  | 70.686  | 77.144 | 51.573 | 59.704 |        |        |        |
| <b>81</b>  | 57.567  | 43.217 | 67.104 | 63.504 | 74.506 | 52.845 |        |
| <b>83</b>  | 49.462  | 64.794 | 61.451 | 91.543 | 89.972 | 50.010 |        |
| <b>84</b>  | 78.130  | 73.854 | 71.740 | 55.225 |        |        |        |
| <b>85</b>  | 81.433  | 50.583 | 62.346 | 85.931 |        |        |        |
| <b>87</b>  | 79.192  | 78.146 | 60.101 | 58.711 | 79.785 | 50.264 |        |
| <b>89</b>  | 59.870  | 67.320 | 74.322 | 57.716 | 80.485 |        |        |
| <b>90</b>  | 64.973  | 46.229 | 61.215 | 60.480 | 52.049 | 41.966 | 63.099 |
| <b>94</b>  | 27.662  | 21.047 | 52.299 | 45.134 | 25.420 |        |        |
| <b>95</b>  | 50.863  | 69.418 | 55.960 | 43.869 | 60.614 |        |        |
| <b>98</b>  | 29.228  | 56.772 | 47.137 | 32.604 | 1.286  |        |        |
| <b>99</b>  | 24.821  | 50.976 | 58.683 | 35.961 | 27.454 |        |        |
| <b>101</b> | 48.718  | 65.342 | 42.113 | 28.893 | 5.735  |        |        |
| <b>105</b> | 24.456  | 46.347 | 50.884 | 50.997 | 60.442 |        |        |
| <b>106</b> | 50.653  | 44.411 | 52.673 | 51.754 |        |        |        |

|            |         |         |          |         |         |         |        |
|------------|---------|---------|----------|---------|---------|---------|--------|
| <b>109</b> | 80.546  | 87.646  | 61.602   | 15.467  | 49.980  | 76.056  |        |
| <b>118</b> | 68.990  | 40.301  | 21.422   | 9.326   | -3.682  |         |        |
| <b>139</b> | -9.145  | 40.170  | 43.825   | 36.902  | 29.850  |         |        |
| <b>142</b> | 59.350  | 48.424  | 57.630   | 0.817   | 53.573  |         |        |
| <b>143</b> | 74.028  | 61.089  | 66.066   | 58.129  | 71.195  |         |        |
| <b>144</b> | 64.971  | 77.274  | 42.343   | 58.242  | 79.182  |         |        |
| <b>148</b> | 29.032  | 30.879  | 9.427    | 32.984  |         |         |        |
| <b>150</b> | -10.473 | 56.061  | 49.893   | 54.010  | 46.095  |         |        |
| <b>152</b> | 73.081  | 4.736   | 60.019   | 43.566  | 59.390  |         |        |
| <b>156</b> | -84.218 | -82.892 | -60.649  | -79.657 | -44.751 |         |        |
| <b>159</b> | 78.052  |         | 69.103   | 70.609  | 6.184   |         |        |
| <b>164</b> | 19.126  | 87.377  | 62.775   | 49.612  | 62.000  |         |        |
| <b>165</b> | 84.679  | 63.343  | 61.778   | 86.479  | 50.339  |         |        |
| <b>166</b> | 33.536  | 68.933  |          | 33.961  | 66.154  |         |        |
| <b>167</b> | 53.481  | 79.502  | 110.248  | 43.466  | 59.443  | 33.874  |        |
| <b>168</b> | 106.967 | 95.495  | 69.045   | 99.903  | 89.471  |         |        |
| <b>169</b> | 45.969  | 50.913  | 52.349   | 12.950  |         |         |        |
| <b>170</b> | 85.478  | 95.072  | 48.334   | 50.421  | 52.717  |         |        |
| <b>171</b> | 53.655  | 68.642  | 44.057   | 29.275  | 47.100  | 90.430  |        |
| <b>172</b> | 97.757  | 91.985  | 94.818   | 86.757  | 85.130  | 129.125 |        |
| <b>173</b> | 53.091  | 46.869  | 44.355   | 44.344  | 58.416  | 61.727  |        |
| <b>174</b> | 51.816  | 80.867  | 59.088   | 16.967  | 48.007  | 41.837  | 41.152 |
| <b>178</b> | 52.565  | 66.331  | 46.502   | 23.849  | 30.799  |         |        |
| <b>180</b> | 24.301  | 66.610  | 49.191   | 61.822  | 71.891  |         |        |
| <b>182</b> | 43.570  | 62.609  | 84.843   | 2.956   | 54.714  |         |        |
| <b>185</b> | 56.825  | 58.945  | 41.827   | 34.820  | 69.190  | 32.672  | 45.129 |
| <b>189</b> | 85.878  | -7.806  | -179.490 | 65.165  | -15.645 |         |        |
| <b>194</b> | 94.241  | 66.432  | 77.929   | 117.389 |         |         |        |
| <b>198</b> | 46.737  | 38.988  | 52.701   | 17.849  | 22.834  |         |        |
| <b>200</b> | 54.872  | 44.565  | 25.920   | 41.265  | 35.198  |         |        |

|            |         |        |         |        |        |        |        |        |
|------------|---------|--------|---------|--------|--------|--------|--------|--------|
| <b>205</b> | 89.032  | 44.456 | 31.976  | 56.053 | 66.945 | 88.376 | 87.528 | 49.612 |
| <b>208</b> | 44.777  | 39.623 | 47.842  | 53.550 | 64.547 | 46.993 |        |        |
| <b>209</b> | 24.840  | 62.006 | 45.961  | 37.090 | 46.958 | 51.319 |        |        |
| <b>210</b> | 71.026  | 31.901 | 65.889  | 48.045 | 51.080 |        |        |        |
| <b>211</b> | 46.203  | 59.387 | 51.701  | 81.467 | 33.855 |        |        |        |
| <b>217</b> | 34.149  | 47.324 | 16.661  | 52.754 | 54.347 |        |        |        |
| <b>218</b> | 58.544  | 23.582 | 58.528  | 69.601 | 50.656 | 56.247 |        |        |
| <b>220</b> | 18.675  | 61.586 | 88.891  | 54.203 | 60.944 |        |        |        |
| <b>221</b> | 40.824  | 54.105 | 43.152  | 1.084  |        |        |        |        |
| <b>223</b> | 80.608  | 67.126 | 33.208  | 94.273 | 55.582 |        |        |        |
| <b>231</b> | 109.711 | 57.299 | 115.576 | 60.912 | 55.743 |        |        |        |
| <b>232</b> | 79.226  | 59.641 | 96.159  | 50.870 | 83.856 |        |        |        |
| <b>233</b> | -62.170 | 33.233 | 63.871  | 28.484 | -5.686 | 33.413 |        |        |
| <b>245</b> | 42.253  | 39.660 | 52.563  | 19.870 | 56.207 |        |        |        |
| <b>246</b> | 90.974  | 93.749 | 63.860  | 89.915 | 65.876 | 80.744 |        |        |
| <b>247</b> | 85.675  | 58.918 | 84.697  | 48.028 | 41.295 |        |        |        |
| <b>248</b> | 24.680  | 39.303 | 30.869  | 49.803 | 52.113 |        |        |        |
| <b>250</b> | 53.743  | 56.817 | 46.476  | 34.739 | 64.088 |        |        |        |
| <b>253</b> | 65.371  | 42.079 | 34.843  | 69.285 | 77.060 |        |        |        |
| <b>254</b> | 25.981  | 58.183 | 50.990  | 56.681 | 59.495 |        |        |        |
| <b>257</b> | 75.279  | 46.280 | 67.023  | 50.801 | 40.223 |        |        |        |
| <b>260</b> | 68.687  | 62.223 | 35.996  | 51.520 | 37.099 | 39.387 |        |        |
| <b>261</b> | 50.071  | 56.478 | 107.451 | 58.521 | -2.093 | 73.333 |        |        |
| <b>274</b> | 41.705  | 43.823 | 48.647  | 59.842 | 5.573  |        |        |        |
| <b>275</b> | 27.702  | 32.179 | 24.757  | 23.316 | 39.931 |        |        |        |
| <b>288</b> | 58.140  | 59.373 | 58.093  | 75.317 | 67.633 |        |        |        |
| <b>289</b> | 55.269  | 40.769 | 75.791  | 70.121 | 56.687 |        |        |        |
| <b>290</b> | 44.810  | 34.396 | 38.616  | 50.439 | 63.655 |        |        |        |
| <b>292</b> | 87.395  | 61.202 | 25.452  | 64.859 | 85.777 |        |        |        |
| <b>295</b> | 39.015  | 17.606 | 39.970  | 39.140 | 48.996 | 23.760 |        |        |



|            |        |        |        |         |        |        |        |
|------------|--------|--------|--------|---------|--------|--------|--------|
| <b>296</b> | 49.001 | 55.621 | 67.528 | 38.753  | 40.624 | 57.792 | 54.490 |
| <b>297</b> | 21.172 | 26.011 | 33.283 | 46.138  | 27.415 |        |        |
| <b>300</b> | 34.467 | 3.248  | 30.354 | 31.044  | 45.528 | 41.623 |        |
| <b>301</b> | 79.665 | 72.903 | 84.010 | 54.710  | 70.947 | 86.599 |        |
| <b>308</b> | 63.663 | 35.947 | 76.505 | 40.244  | 45.529 |        |        |
| <b>309</b> | 60.169 | 63.308 | 29.813 | 63.784  | 78.193 |        |        |
| <b>313</b> | 62.489 | 71.477 | 37.224 | 60.396  | 56.587 |        |        |
| <b>314</b> | 53.670 | 50.812 | 52.446 | 71.910  | 69.807 | 50.611 |        |
| <b>318</b> | 59.329 | 90.099 | 80.462 | 60.640  | 59.711 | 50.096 |        |
| <b>322</b> | 32.991 | 42.790 | 70.162 | 49.858  | 43.646 |        |        |
| <b>323</b> | 54.486 | 55.037 | 61.565 | 45.819  | 32.236 |        |        |
| <b>324</b> | 59.758 | 40.274 | 53.207 | -12.722 | 36.134 |        |        |
| <b>325</b> | 57.885 | 58.317 | 60.435 | 30.498  | 43.503 | 38.125 |        |
| <b>326</b> | 54.369 | 67.366 | 98.776 | 83.383  | 71.581 | 74.774 |        |
| <b>327</b> | 49.526 | 61.532 | 55.408 | 71.328  |        |        |        |
| <b>328</b> | 51.578 | 69.587 | 50.096 | 43.013  | 45.721 | 70.306 |        |
| <b>329</b> | 55.543 | 60.986 | 56.023 | 46.766  | 54.185 |        |        |
| <b>330</b> | 62.798 | 29.417 | 57.708 | 37.959  | 44.099 | 38.227 |        |
| <b>332</b> | 40.022 | 65.854 | 55.044 | 16.740  | 92.694 |        |        |
| <b>333</b> | 50.479 | 60.930 | 60.131 | 41.914  | 87.491 | 26.959 |        |
| <b>338</b> | 61.411 | 56.319 | 46.086 | 77.171  | 61.914 |        |        |

## References:

- (1) O'Boyle, N. M.; Banck, M.; James, C. A.; Morley, C.; Vandermeersch, T.; Hutchison, G. R. Open Babel: An open chemical toolbox. *J. Cheminform.* **2011**, *3*, 33.
- (2) Baker, E. N.; Hubbard, R. E. Hydrogen bonding in globular proteins. *Prog. Biophys. Mol. Biol.* **1984**, *44*, 97–179.
- (3) Jiang, L.; Kuhlman, B.; Kortemme, T.; Baker, D. A “solvated rotamer” approach to modeling water-mediated hydrogen bonds at protein-protein interfaces. *Proteins: Struct., Funct., Bioinf.* **2005**, *58*, 893–904.
- (4) Auffinger, P.; Hays, F. A.; Westhof, E.; Ho, P. S. Halogen bonds in biological molecules. *Proc. Natl. Acad. Sci. USA* **2004**, *101*, 16789–16794.
- (5) Barlow, D. J.; Thornton, J. M. Ion-pairs in proteins. *J. Mol. Biol.* **1983**, *168*, 867–885.
- (6) Gallivan, J. P.; Dougherty, D. A. Cation-pi interactions in structural biology. *Proc. Natl. Acad. Sci. USA* **1999**, *96*, 9459–9464.
- (7) McGaughey, G. B.; Gagné, M.; Rappé, A. K. pi-Stacking interactions. Alive and well in proteins. *J. Biol. Chem.* **1998**, *273*, 15458–15463.
- (8) Lonsdale, R.; Houghton, K. T.; Žurek, J.; Bathelt, C. M.; Foloppe, N.; de Groot, M. J.; Harvey, J. N.; Mulholland, A. J. Quantum Mechanics/Molecular Mechanics Modeling of Regioselectivity of Drug Metabolism in Cytochrome P450 2C9. *J. Am. Chem. Soc.* **2013**, *135*, 8001–8015.
